# Supplementary material for: Substantial hysteresis in emergent temperature sensitivity of global wetland CH4 emissions
Source: PubMed Central journal article supplement (PMC8050324; doi:10.1038/s41467-021-22452-1), 2021-04-15
Supplement: 41467_2021_22452_MOESM1_ESM.pdf [file 41467_2021_22452_MOESM1_ESM.pdf]

Supplementary Information for

**Substantial hysteresis in emergent temperature sensitivity of global wetland CH<sub>4</sub> emissions**

Kuang-Yu Chang et al.

*Correspondence to: Kuang-Yu Chang (ckychang@lbl.gov)*

Supplemental Table 1. Characteristics of wetland and rice paddy sites currently included in the FLUXNET-CH<sub>4</sub> database. LAT and LON stand for latitude and longitude, respectively.

| Site ID | Site Name                  | Country     | LAT    | LON     | Biome                  | Ecosystem Type           | Site PI             | DOI/<br>Dataset                                                                             |
|---------|----------------------------|-------------|--------|---------|------------------------|--------------------------|---------------------|---------------------------------------------------------------------------------------------|
| CA-SCB  | Scotty Creek Bog           | Canada      | 61.31  | -121.30 | Taiga                  | Bog                      | Sonnentag & Helbig  | doi.org/10.17190/AMF/1498754                                                                |
| CA-SCC  | Scotty Creek Peat plateau  | Canada      | 61.31  | -121.30 | Taiga                  | Peat plateau; forest-bog | Sonnentag & Helbig  | <a href="https://doi.org/10.17190/AMF/1480303">doi.org/10.17190/AMF/1480303</a>             |
| DE-SfN  | Schechenfilz Nord          | Germany     | 47.81  | 11.33   | Temperate              | Bog                      | Schmid              | European Fluxes Database Cluster                                                            |
| DE-Zrk  | Zarnekow                   | Germany     | 53.88  | 12.89   | Temperate              | Fen                      | Sachs               | European Fluxes Database Cluster                                                            |
| FI-Lom  | Lompolojankka              | Finland     | 68.00  | 24.21   | Taiga                  | Fen                      | Lohila & Aurela     | European Fluxes Database Cluster                                                            |
| FI-Si2  | Siikaneva II               | Finland     | 61.84  | 24.17   | Taiga                  | Bog                      | Vesala & Mammarella | European Fluxes Database Cluster                                                            |
| FI-Sii  | Siikaneva I                | Finland     | 61.83  | 24.19   | Taiga                  | Fen                      | Vesala & Mammarella | European Fluxes Database Cluster                                                            |
| IT-Cas  | Castellaro                 | Italy       | 45.07  | 8.72    | Temperate              | Rice                     | Cescatti            | European Fluxes Database Cluster                                                            |
| JP-BBY  | Bibai Mire                 | Japan       | 43.32  | 141.81  | Temperate              | Bog                      | Ueyama              | European Fluxes Database Cluster                                                            |
| JP-Mse  | Mase paddy flux site       | Japan       | 36.05  | 140.03  | Temperate              | Rice                     | Miyata              | European Fluxes Database Cluster                                                            |
| KR-CRK  | Cheorwon Rice paddy South  | South Korea | 38.20  | 127.25  | Temperate              | Rice                     | Ryu & Kang          | European Fluxes Database Cluster                                                            |
| MY-MLM  | Maludam                    | Malaysia    | 1.45   | 111.15  | Tropical & Subtropical | Swamp                    | Tang                | <a href="https://doi.org/10.5281/zenodo.1161966">https://doi.org/10.5281/zenodo.1161966</a> |
| NZ-Kop  | Kopuatai                   | New Zealand | -37.39 | 175.55  | Temperate              | Bog                      | Campbell            | DOI: 10.18140/FLX/1669652                                                                   |
| RU-Ch2  | Chersky reference          | Russia      | 68.62  | 161.35  | Taiga                  | Wet tundra               | Goeckede            | European Fluxes Database Cluster                                                            |
| RU-Che  | Chersky                    | Russia      | 68.61  | 161.34  | Taiga                  | Wet tundra               | Goeckede            | European Fluxes Database Cluster                                                            |
| RU-SAM  | Samoylov                   | Russia      | 72.37  | 126.50  | Tundra                 | Wet tundra               | Sachs               | European Fluxes Database Cluster                                                            |
| RU-Vrk  | Seida/Vorkuta              | Russia      | 67.06  | 62.94   | Tundra                 | Wet tundra               | Friborg             | European Fluxes Database Cluster                                                            |
| SE-Deg  | Degero                     | Sweden      | 64.18  | 19.56   | Taiga                  | Fen                      | Nilsson & Peichl    | European Fluxes Database Cluster                                                            |
| SE-St1  | Stordalen grassland (Mire) | Sweden      | 68.35  | 19.05   | Tundra                 | Fen                      | Friborg             | European Fluxes Database Cluster                                                            |
| SE-Sto  | Stordalen Palsa Bog        | Sweden      | 68.36  | 19.05   | Tundra                 | Bog                      | Friborg             | European Fluxes Database Cluster                                                            |
| US-Atq  | Atqasuk                    | USA         | 70.47  | -157.41 | Tundra                 | Wet tundra               | Zona                | doi:10.17190/AMF/1246029                                                                    |
| US-Beo  | Barrow                     | USA         | 71.28  | -156.61 | Tundra                 | Wet tundra               | Donatella Zona      | DOI:10.18140/FLX/1669664                                                                    |
| US-Bes  | Barrow                     | USA         | 71.28  | -156.60 | Tundra                 | Wet tundra               | Zona                | DOI:10.18140/FLX/1669665                                                                    |
| US-Bgl  | Bog Lake peatland          | USA         | 47.53  | -93.74  | Temperate              | Fen                      | Verma               | AmeriFlux                                                                                   |

|        |                                           |     |       |          |             |            |               |                                                                                         |
|--------|-------------------------------------------|-----|-------|----------|-------------|------------|---------------|-----------------------------------------------------------------------------------------|
| US-Bzb | Thermokarst collapse scar bog             | USA | 64.7  | -148.32  | Taiga       | Bog        | Euskirchen    | <a href="https://doi.org/10.18140/FLX/1669668">https://doi.org/10.18140/FLX/1669668</a> |
| US-Bzf | Rich Fen                                  | USA | 64.70 | -148.313 | Taiga       | Fen        | Euskirchen    | <a href="https://doi.org/10.17190/AMF/1756433">doi.org/10.17190/AMF/1756433</a>         |
| US-HRA | Humnoke Farm Rice Field AWD               | USA | 34.59 | -91.75   | Temperate   | Rice       | Runkle        | <a href="https://doi.org/10.17190/AMF/1543376">doi.org/10.17190/AMF/1543376</a>         |
| US-HRC | Humnoke Farm Rice Field conventional      | USA | 34.59 | -91.75   | Temperate   | Rice       | Reba          | <a href="https://doi.org/10.17190/AMF/1543375">doi.org/10.17190/AMF/1543375</a>         |
| US-Ics | Wet sedge tundra                          | USA | 68.61 | -149.31  | Tundra      | Wet tundra | Euskirchen    | doi: 10.17190/AMF/1246130                                                               |
| US-Ivo | Ivotuk                                    | USA | 68.49 | -155.75  | Tundra      | Wet tundra | Zona          | doi:10.17190/AMF/1246067                                                                |
| US-LA1 | Pointe-aux-Chenes Brackish Marsh Salvador | USA | 29.50 | -90.45   | Subtropical | Salt Marsh | Krauss & Holm | <a href="https://doi.org/10.17190/AMF/1543386">doi.org/10.17190/AMF/1543386</a>         |
| US-LA2 | WMA Freshwater Marsh                      | USA | 29.86 | -90.29   | Subtropical | Marsh      | Krauss & Holm | <a href="https://doi.org/10.17190/AMF/1543387">doi.org/10.17190/AMF/1543387</a>         |
| US-Los | Lost Creek Marsh                          | USA | 46.08 | -89.98   | Temperate   | Fen        | Desai         | doi: 10.17190/AMF/1246071                                                               |
| US-MRM | Resource Meadowlands Mitigation Bank      | USA | 40.82 | -74.04   | Temperate   | Salt Marsh | Schäfer       | DOI:10.18140/FLX/1669684                                                                |
| US-Myb | Mayberry Wetland                          | USA | 38.05 | -121.77  | Temperate   | Marsh      | Baldocchi     | doi: 10.17190/AMF/1246139                                                               |
| US-NC4 | NC Alligator River                        | USA | 35.79 | -75.90   | Temperate   | Swamp      | Noormets      | doi:10.17190/AMF/1480314                                                                |
| US-NGB | NGEE Barrow                               | USA | 71.28 | -156.61  | Tundra      | Wet tundra | Torn          | doi: 10.17190/AMF/1436326                                                               |
| US-NGC | NGEE Arctic Council                       | USA | 64.86 | -163.70  | Taiga       | Wet tundra | Torn          | <a href="https://doi.org/10.17190/AMF/1634883">doi.org/10.17190/AMF/1634883</a>         |
| US-ORv | Olentangy River Wetland Research Park     | USA | 40.02 | -83.02   | Temperate   | Marsh      | Bohrer        | doi:10.17190/AMF/1246135                                                                |
| US-OWC | Old Woman Creek Sherman                   | USA | 41.38 | -82.51   | Temperate   | Marsh      | Bohrer        | doi: 10.17190/AMF/1246094                                                               |
| US-Sne | Island Restored Wetland                   | USA | 38.04 | -121.76  | Temperate   | Marsh      | Baldocchi     | doi: 10.17190/AMF/1418684                                                               |
| US-Srr | Suisun marsh - Rush Ranch                 | USA | 38.20 | -122.03  | Temperate   | Salt Marsh | Windham-Myers | doi:10.17190/AMF/1418685                                                                |
| US-StJ | St Jones Reserve Twitchell                | USA | 39.09 | -75.44   | Temperate   | Salt Marsh | Vargas        | doi:10.17190/AMF/1480316                                                                |
| US-Tw1 | West Pond Wetland                         | USA | 38.11 | -121.65  | Temperate   | Marsh      | Baldocchi     | doi: 10.17190/AMF/1246147                                                               |
| US-Tw4 | Twitchell East End                        | USA | 38.10 | -121.64  | Temperate   | Marsh      | Baldocchi     | doi: 10.17190/AMF/1246148                                                               |

| Wetland |                                       |     |       |         |           |       |           |                               |
|---------|---------------------------------------|-----|-------|---------|-----------|-------|-----------|-------------------------------|
| US-Twt  | Twitchell<br>Rice                     | USA | 38.11 | -121.65 | Temperate | Rice  | Baldocchi | doi: 10.17190/AM<br>F/1246151 |
| US-Uaf  | University of<br>Alaska,<br>Fairbanks | USA | 64.87 | -147.86 | Taiga     | Bog   | Ueyama    | doi:10.17190/A<br>MF/1480322  |
| US-WPT  | Winous Point<br>North Marsh           | USA | 41.46 | -83.00  | Temperate | Marsh | Chu       | doi: 10.17190/AM<br>F/1246155 |

---

Supplemental Table 2. Description of model configurations used in the six sets of regression models representing varying degrees of spatial and temporal variability between CH<sub>4</sub> emission and air temperature.

|                               | Model<br>group 1<br><i>f(T, site, IAV, ISV)</i> | Model<br>group 2<br><i>f(T, site, IAV)</i> | Model<br>group 3<br><i>f(T, site)</i> | Model<br>group 4<br><i>f(T, type, ISV)</i> | Model<br>group 5<br><i>f(T, type)</i> | Model<br>group 6<br><i>f(T)</i> |
|-------------------------------|-------------------------------------------------|--------------------------------------------|---------------------------------------|--------------------------------------------|---------------------------------------|---------------------------------|
| Temperature                   | Yes                                             | Yes                                        | Yes                                   | Yes                                        | Yes                                   | Yes                             |
| Inter-type<br>variability     | Yes                                             | Yes                                        | Yes                                   | Yes                                        | Yes                                   | No                              |
| Inter-site<br>variability     | Yes                                             | Yes                                        | Yes                                   | No                                         | No                                    | No                              |
| Inter-annual<br>variability   | Yes                                             | Yes                                        | No                                    | No                                         | No                                    | No                              |
| Intra-seasonal<br>variability | Yes                                             | No                                         | No                                    | Yes                                        | No                                    | No                              |

Emergent temperature responses may change during the course of the frost-free season within the same site-year (i.e., intra-seasonal variability), among frost-free seasons within the same ecosystem site (i.e., inter-annual variability), among sites within the same ecosystem type (i.e., inter-site variability), and among ecosystem types (i.e., inter-type variability).

## FLUXNET-CH<sub>4</sub> Wetland Map

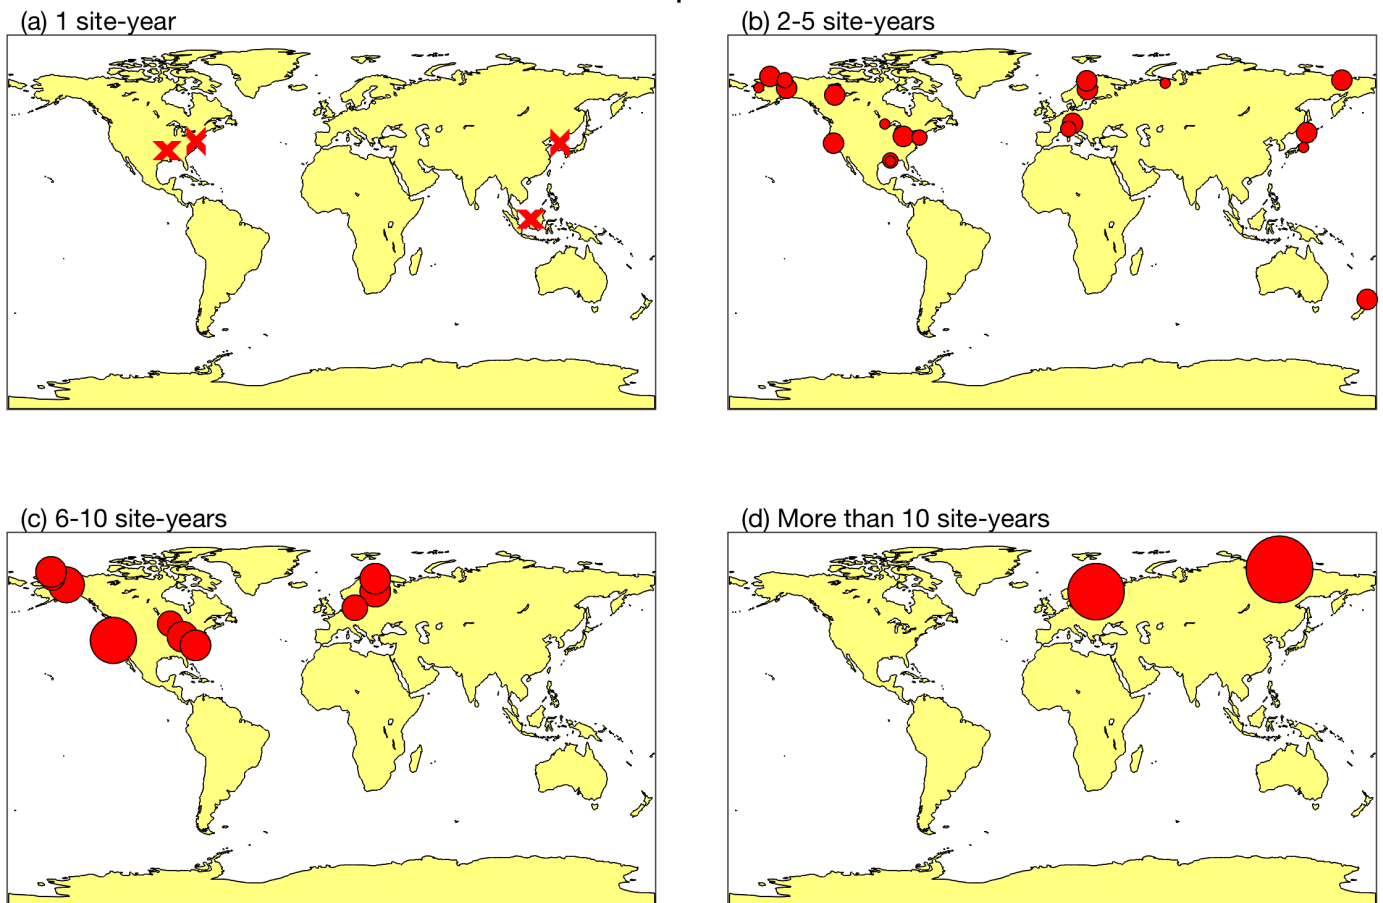

Supplemental Figure 1. **Geographical locations of wetland and rice paddy sites currently included in the FLUXNET-CH<sub>4</sub> database.** For sites that have measurement records for a single site-year (a), 2 - 5 site-years (b), 6 - 10 site-years (c), and more than 10 site-years (d). Circle sizes are proportional to the number of site-years at each site (1b to 1d).

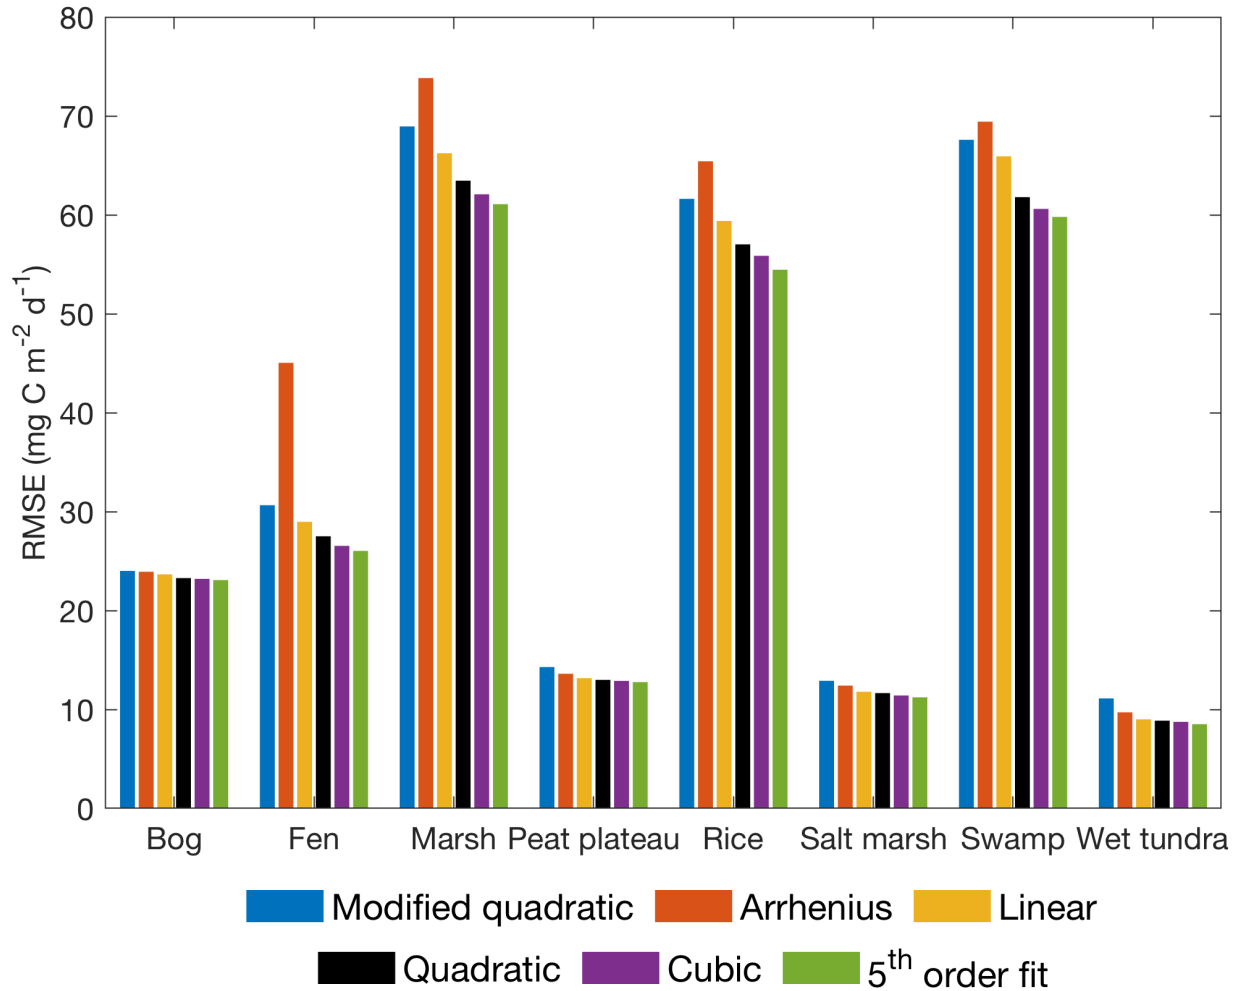

Supplemental Figure 2. **The Root mean squared errors (RMSE) for daily CH<sub>4</sub> emission predictions are comparable among temperature dependence models.** RMSE comparison among daily CH<sub>4</sub> emissions estimated by temperature dependence models based on different curve fitting schemes in each ecosystem type. The abbreviations used in each curve fitting class represent the quadratic equation used in this study (Modified quadratic), the Boltzmann-Arrhenius equation used in this study (Arrhenius), first order polynomial fit (Linear), second order polynomial fit (Quadratic), third order polynomial fit (Cubic), and fifth order polynomial fit (5<sup>th</sup> order fit).

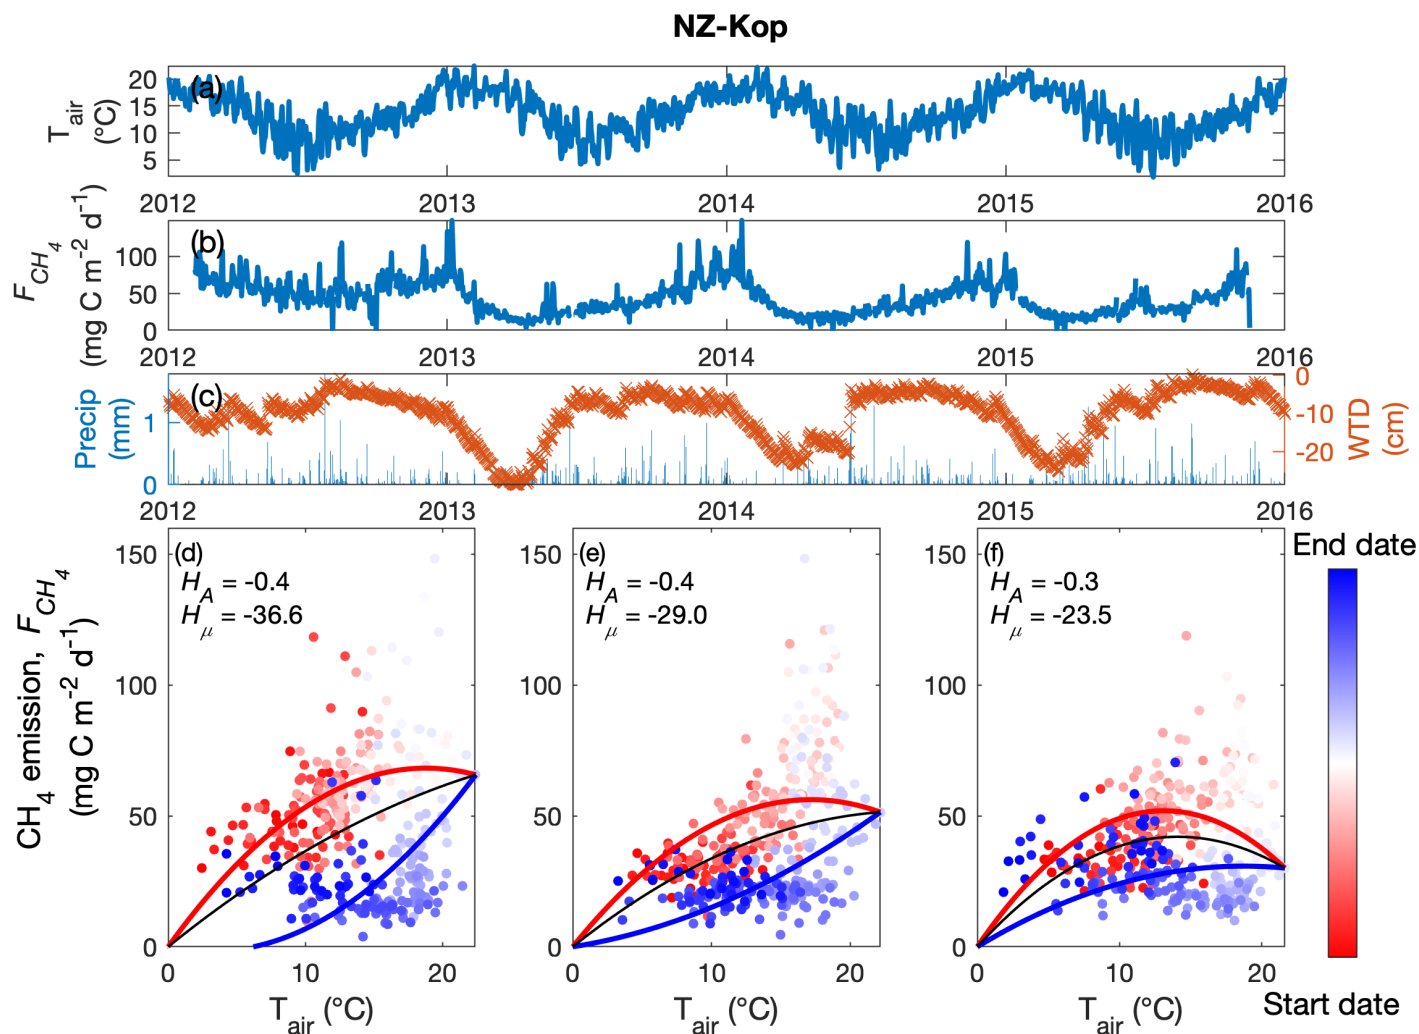

Supplemental Figure 3. **Negative seasonal  $F_{\text{CH}_4}$  hysteresis can occur when WTD drops below the critical zone of  $\text{CH}_4$  production later in the frost-free season.** The quality-controlled daily air temperature (a) and  $\text{CH}_4$  emissions (b), precipitation (c, left axis), and water table depth (c, right axis) measured at Kopuatai in New Zealand (NZ-Kop) from 2012 to 2015.  $\text{CH}_4$  emission air temperature dependencies (lines) derived from daily measurements (dots) recorded at NZ-Kop for 2012–2013 (d), 2013–2014 (e), and 2014–2015 (f). The results inferred from earlier and later parts of the frost-free season, and full frost-free season are colored in red, blue, and black, respectively. Start and end dates represent the beginning and ending of the frost-free season, respectively.  $H_{\mu}$  and  $H_A$  denote the mean seasonal  $\text{CH}_4$  emission hysteresis and normalized area of seasonal  $\text{CH}_4$  emission hysteresis calculated in each site-year, respectively. Note that site-years were defined by warming and cooling cycles (i.e., a site-year is composed by the warming branch in the previous calendar year and the



cooling branch in the current calendar year) to account for the opposite seasonal cycle in the Southern compared to the Northern Hemisphere.

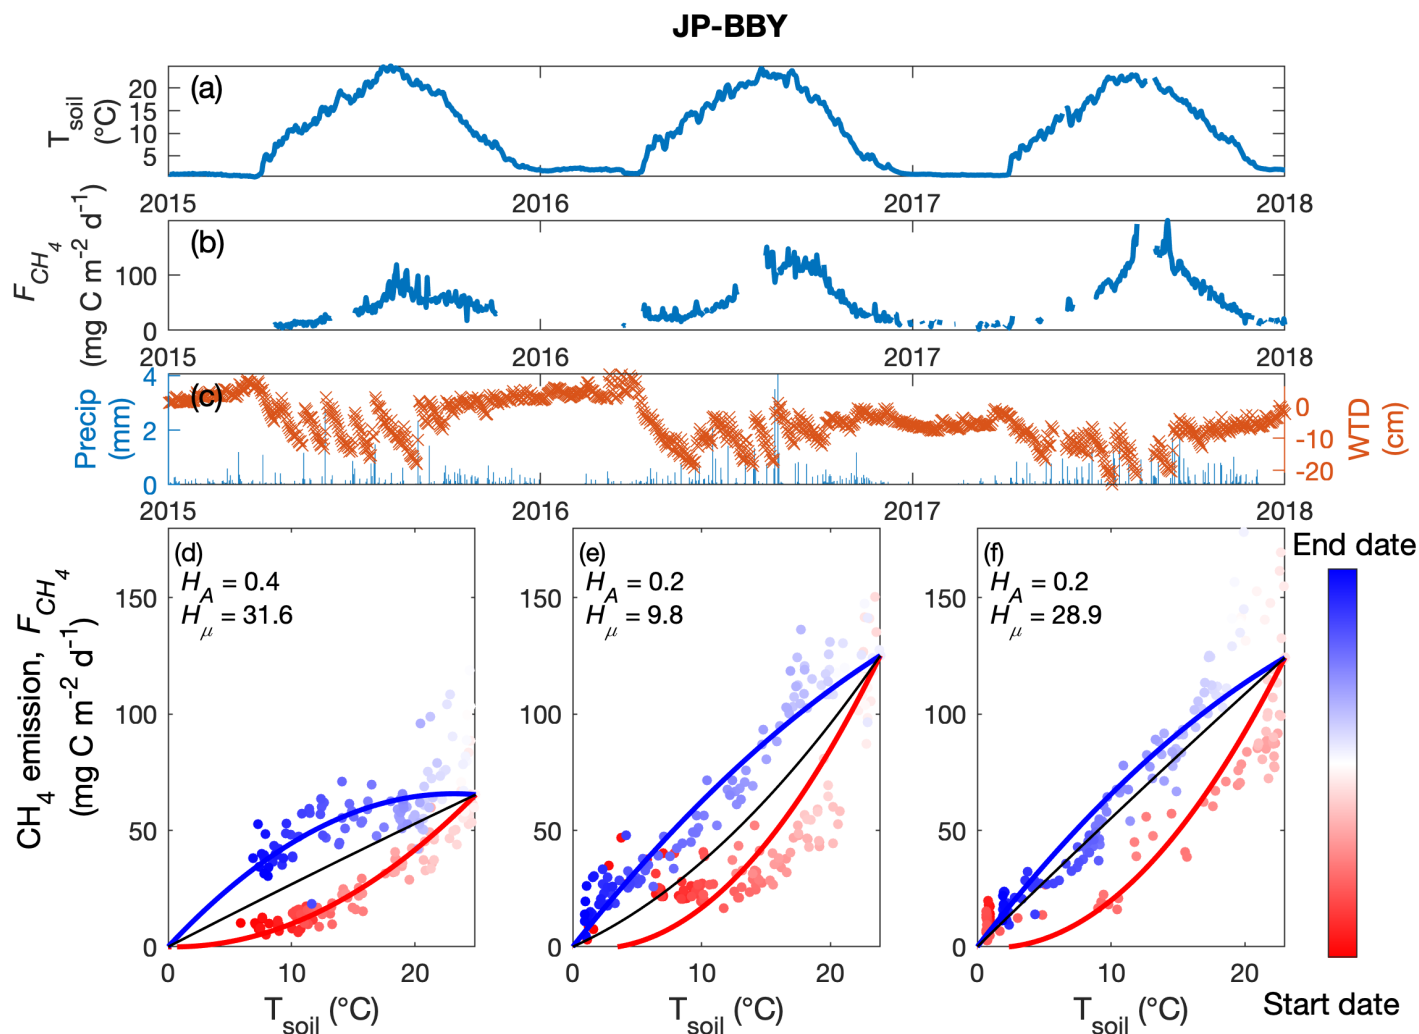

Supplemental Figure 4. **The hysteretic relationship between CH<sub>4</sub> emission and soil temperature is consistent with the patterns found using air temperature.** The same as Fig. 1 except using soil temperature. The quality-controlled daily soil temperature measured at the shallowest soil layer (a), CH<sub>4</sub> emissions (b), precipitation (c, left axis), and water table depth (c, right axis) measured at the Bibai Mire in Japan (JP-BBY) from 2015 to 2017. CH<sub>4</sub> emission soil temperature dependencies (lines) derived from daily measurements (dots) recorded at JP-BBY for 2015 (d), 2016 (e), and 2017 (f). The results inferred from earlier and later parts of the frost-free season, and full frost-free season are colored in red, blue, and black, respectively. Start and end dates represent the beginning and ending of the frost-free season, respectively.  $H_{\mu}$  and  $H_A$  denote the mean seasonal CH<sub>4</sub> emission hysteresis and normalized area of seasonal CH<sub>4</sub> emission hysteresis calculated in each site-year, respectively.

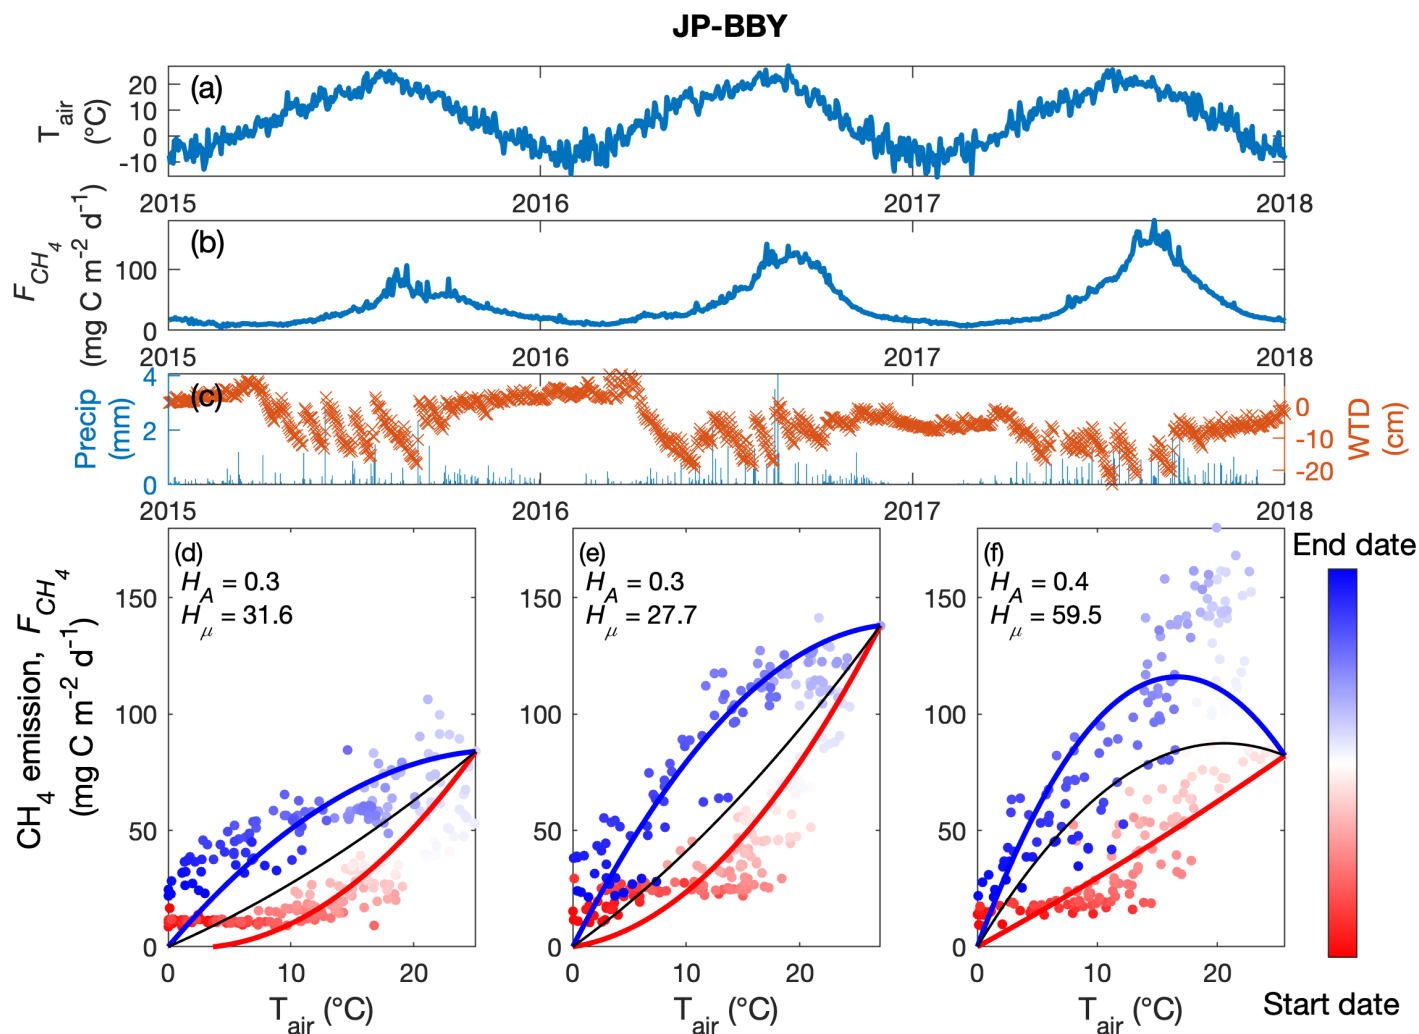

Supplemental Figure 5. **The hysteretic relationship between gap-filled CH<sub>4</sub> emission and air temperature is consistent with the patterns found using non-gap-filled data.** The same as Fig. 1 except using gap-filled data. The daily air temperature (a), CH<sub>4</sub> emissions (b) gap-filled by Artificial Neural Networks, and precipitation (c, left axis), and water table depth (c, right axis) measured at the Bibai Mire in Japan (JP-BBY) from 2015 to 2017. CH<sub>4</sub> emission air temperature dependencies (lines) derived from daily measurements (dots) recorded at JP-BBY for 2015 (d), 2016 (e), and 2017 (f). The results inferred from earlier and later parts of the frost-free season, and full frost-free season are colored in red, blue, and black, respectively. Start and end dates represent the beginning and ending of the frost-free season, respectively.  $H_{\mu}$  and  $H_A$  denote the mean seasonal CH<sub>4</sub> emission hysteresis and normalized area of seasonal CH<sub>4</sub> emission hysteresis calculated in each site-year, respectively.

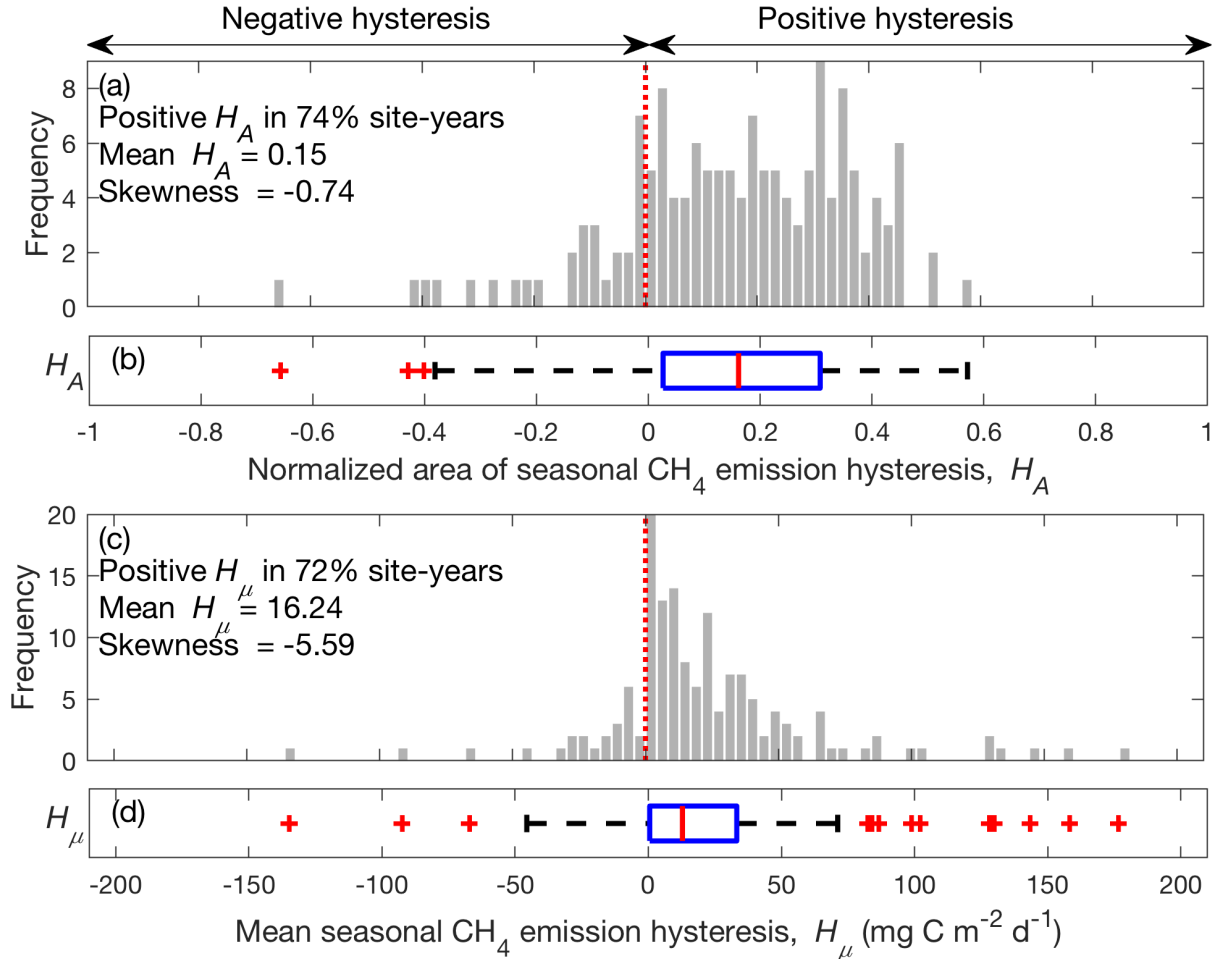

Supplemental Figure 6. **The distribution of seasonal CH<sub>4</sub> emission hysteresis inferred from monthly estimates is consistent with the patterns found using daily estimates.** The distribution of normalized area of seasonal CH<sub>4</sub> emission hysteresis ( $H_A$ ; a, b) and mean seasonal CH<sub>4</sub> emission hysteresis ( $H_\mu$ ; c, d) to air temperature among site-years derived from the FLUXNET-CH<sub>4</sub> database. Positive seasonal CH<sub>4</sub> emission hysteresis indicates higher CH<sub>4</sub> emissions later in the frost-free season at the same temperature (e.g., Fig. 1d, e, f). Red dashed lines represent the y-axis in each data group (i.e., no hysteresis). The corresponding boxplot of site-year specific  $H_A$  (b) and  $H_\mu$  (d) derived from the FLUXNET-CH<sub>4</sub> database. The red central mark, and the bottom and top edges of the blue box indicate the median, and the 25<sup>th</sup> and 75<sup>th</sup> percentiles, respectively. The black whiskers extend to the most extreme data points not considered outliers denoted in red plus symbol.

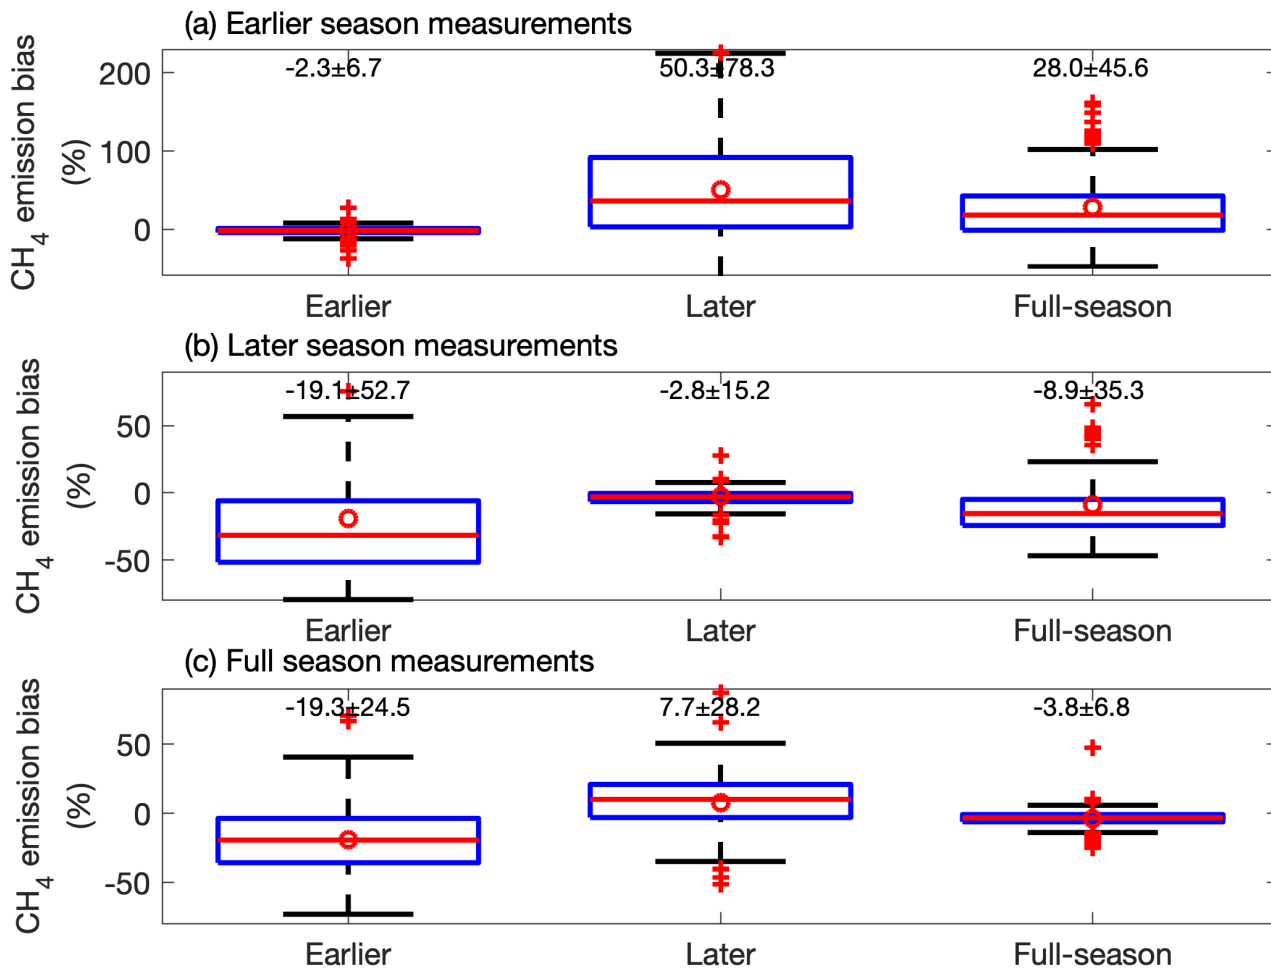

Supplemental Figure 7. **The accuracy of CH<sub>4</sub> emission predictions made by emergent air temperature dependence on CH<sub>4</sub> emission relies on the sampling period of the frost-free season.** CH<sub>4</sub> emission bias associated with using emergent air temperature dependence models inferred from earlier, later, and full-season measurements taken from a frost-free season during the earlier (a), later (b), and full-season periods (c) across global wetland and rice paddy sites. The red central mark and open circle, and the bottom and top edges of the blue box indicate the median and mean, and the 25<sup>th</sup> and 75<sup>th</sup> percentiles, respectively. The black whiskers extend to the most extreme data points not considered outliers denoted in red plus symbol(s). Numbers above each boxplot indicate the mean ± standard deviation.

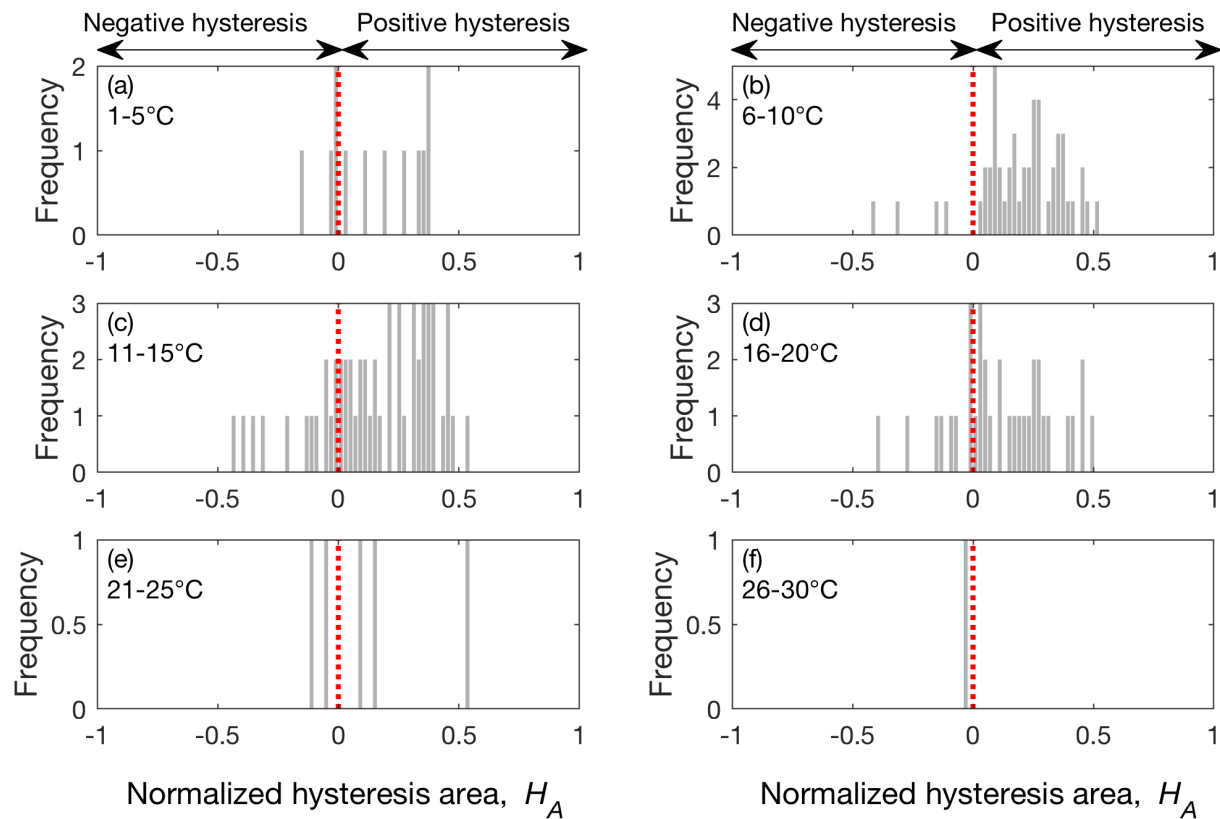

Supplemental Figure 8. **Predominantly positive seasonal CH<sub>4</sub> emission hysteresis ( $H_A$ ) to air temperature is found across different range of mean seasonal air temperatures.** The distribution of normalized area of seasonal CH<sub>4</sub> emission hysteresis ( $H_A$ ) to air temperature among site-years at individual mean seasonal temperature windows derived from the FLUXNET-CH<sub>4</sub> database. Each subpanel is evaluated for a different range of air temperatures. Positive seasonal CH<sub>4</sub> emission hysteresis indicates higher CH<sub>4</sub> emissions later in the frost-free season at the same temperature (e.g., Fig. 1d to 1f). Red dashed lines represent the y-axis in each data group (i.e., no hysteresis).

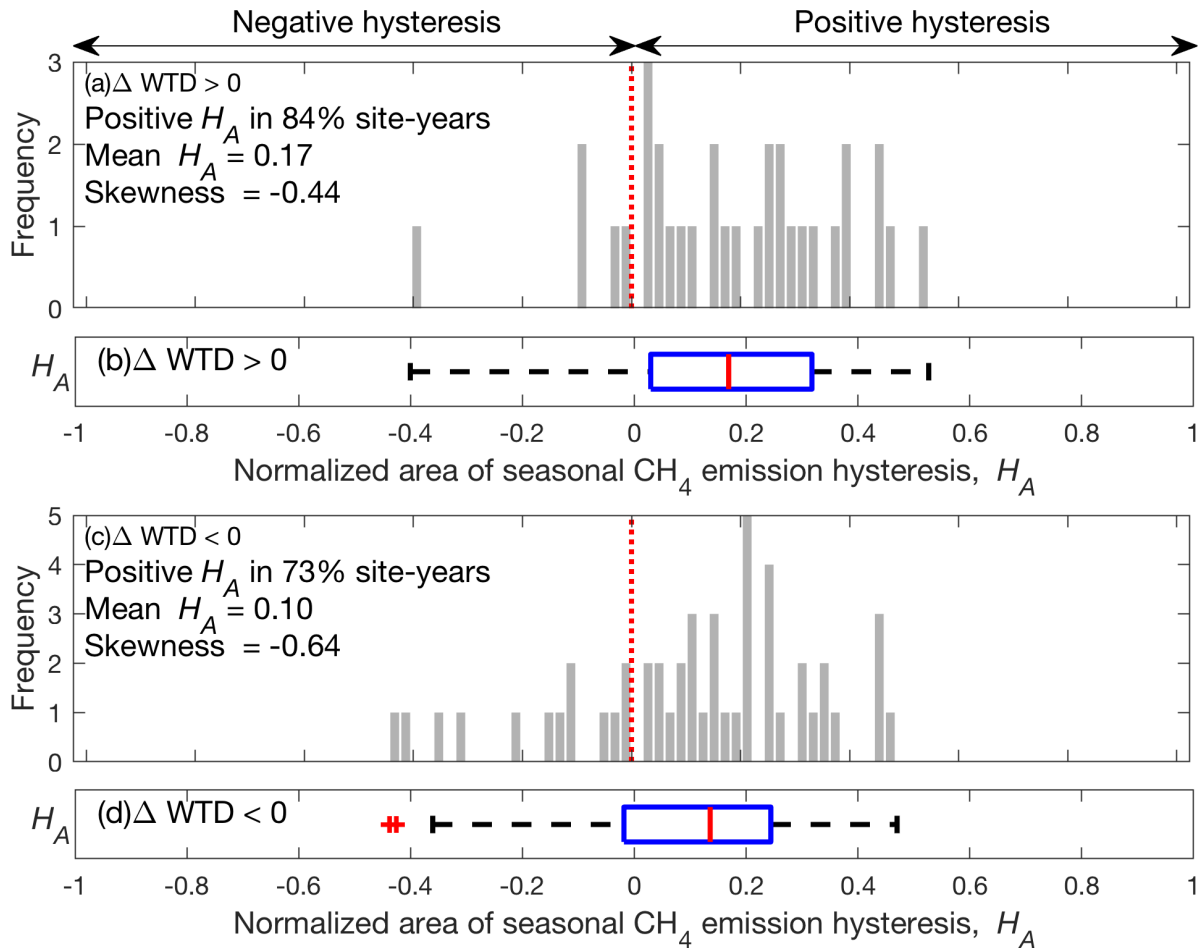

Supplemental Figure 9. **Predominantly positive seasonal CH<sub>4</sub> emission hysteresis ( $H_A$ ) to air temperature is found across different wetness condition.** The distribution of normalized area of seasonal CH<sub>4</sub> emission hysteresis ( $H_A$ ) to air temperature among site-years derived from the FLUXNET-CH<sub>4</sub> database when mean water table depth is higher (a) and lower (c) later in the frost-free season. Positive seasonal CH<sub>4</sub> emission hysteresis indicates higher CH<sub>4</sub> emissions later in the frost-free season at the same temperature (e.g., Fig. 1d to 1f). Red dashed lines represent the y-axis in each data group (i.e., no hysteresis). The corresponding boxplot of site-year specific  $H_A$  derived from the FLUXNET-CH<sub>4</sub> database (b, d). The red central mark, and the bottom and top edges of the blue box indicate the median, and the 25<sup>th</sup> and 75<sup>th</sup> percentiles, respectively. The black whiskers extend to the most extreme data points not considered outliers denoted in red plus symbol(s).

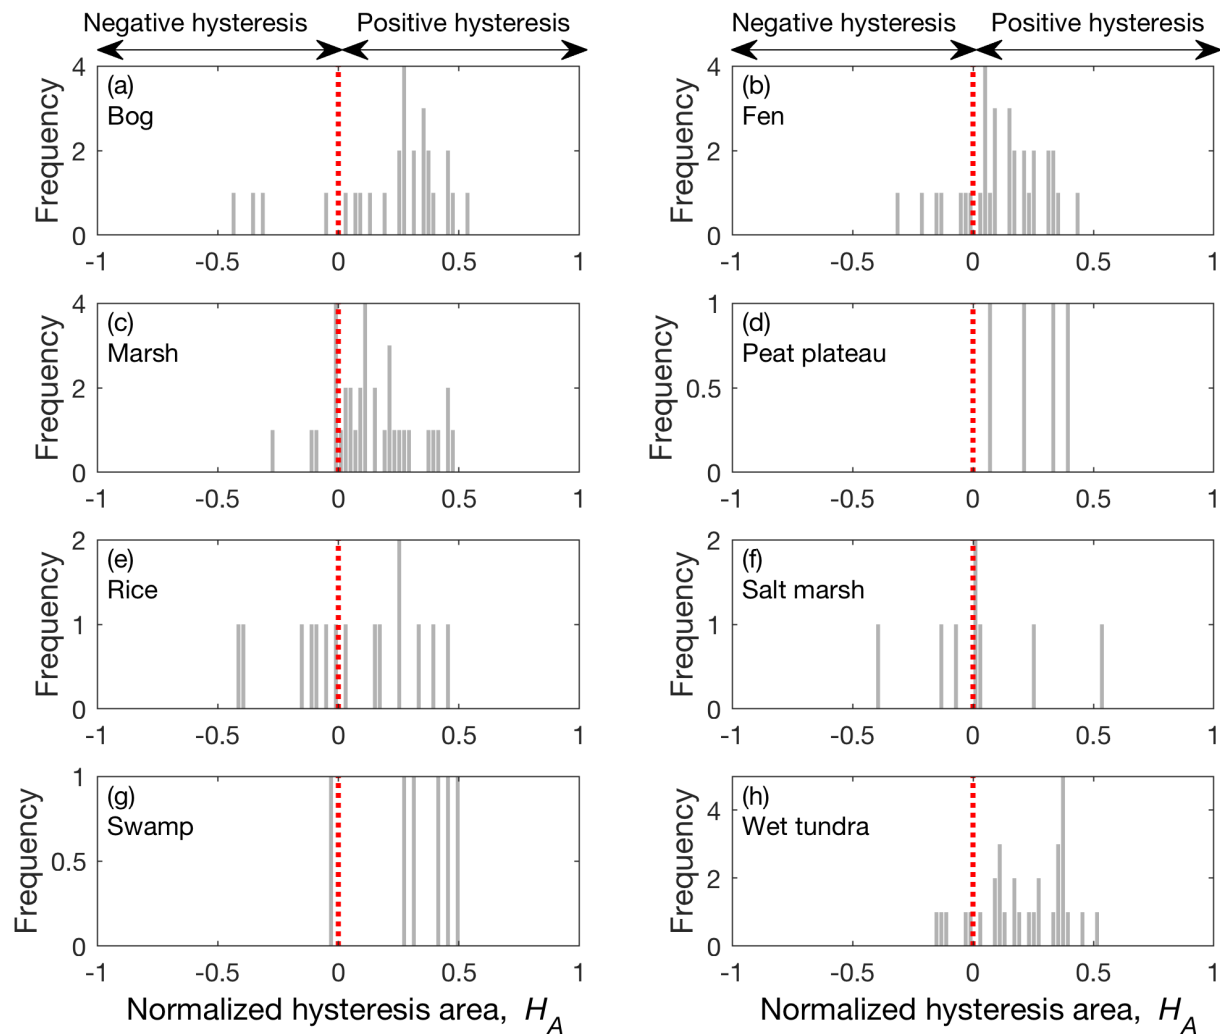

Supplemental Figure 10. **Predominantly positive seasonal CH<sub>4</sub> emission hysteresis ( $H_A$ ) to air temperature is found across different ecosystem types.** The distribution of normalized area of seasonal CH<sub>4</sub> emission hysteresis ( $H_A$ ) to air temperature among site-years at individual ecosystem types derived from the FLUXNET-CH<sub>4</sub> database. Positive seasonal CH<sub>4</sub> emission hysteresis indicates higher CH<sub>4</sub> emissions later in the frost-free season at the same temperature (e.g., Fig. 1d to 1f). Red dashed lines represent the y-axis in each data group (i.e., no hysteresis).



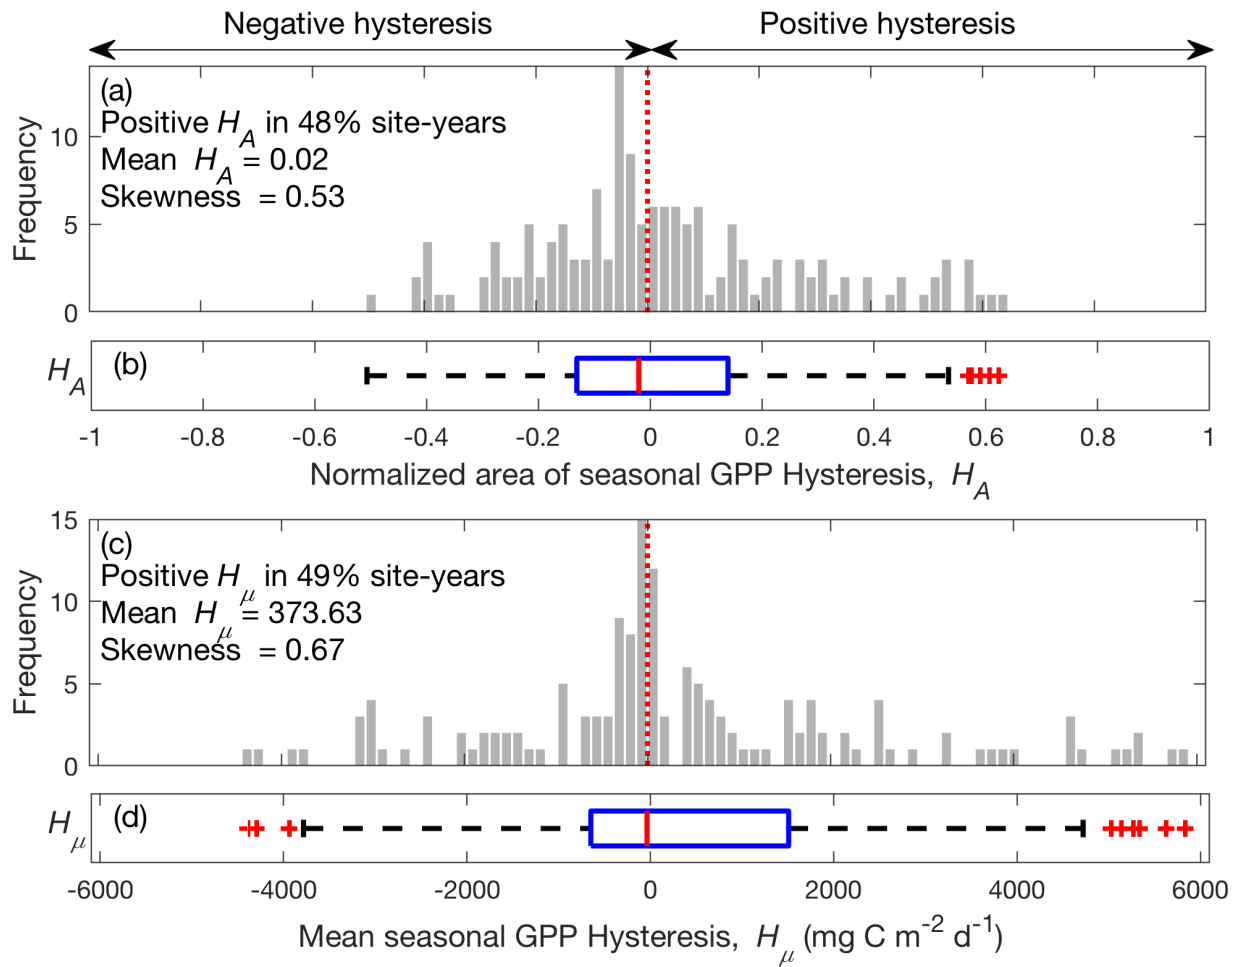

Supplemental Figure 11. **Intra-seasonal changes in emergent air temperature dependencies on gross primary productivity (GPP) show about equal site-year proportions of positive and negative seasonal GPP.** The distribution of mean seasonal gross primary productivity (GPP) hysteresis (a) and normalized area of seasonal GPP hysteresis (c) to air temperature among site-years derived from the FLUXNET-CH<sub>4</sub> database. Positive seasonal GPP hysteresis indicates higher GPP later in the frost-free season at the same air temperature. Red dashed lines represent the y-axis in each data group (i.e., no hysteresis). The corresponding boxplot of site-year specific mean seasonal GPP hysteresis (b) and normalized area of seasonal GPP hysteresis (d) derived from the FLUXNET-CH<sub>4</sub> database. The red central mark, and the bottom and top edges of the blue box indicate the median, and the 25<sup>th</sup> and 75<sup>th</sup> percentiles, respectively. The black whiskers extend to the most extreme data points not considered outliers denoted in red plus symbol(s).

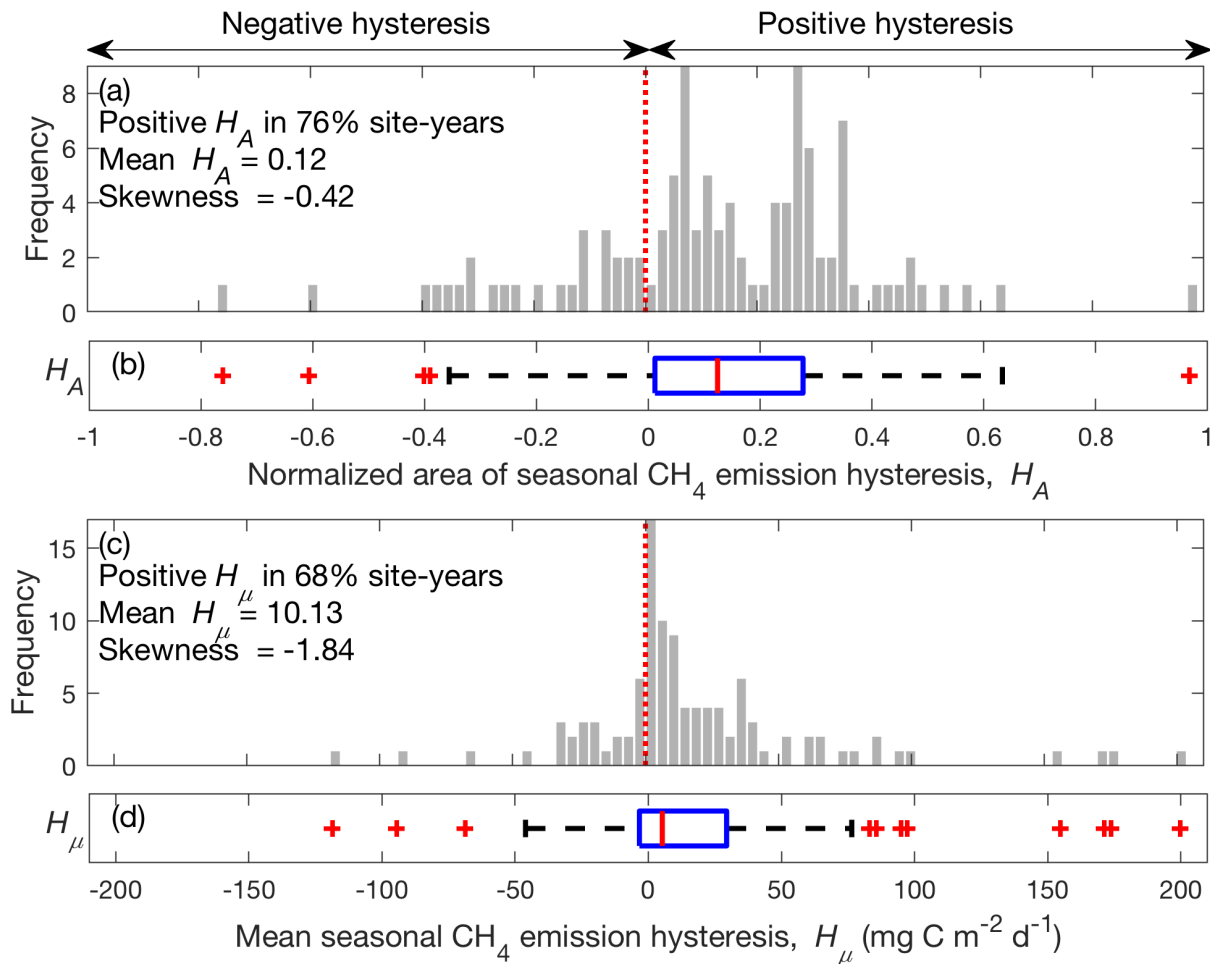

Supplemental Figure 12. **Predominantly positive seasonal  $\text{CH}_4$  emission hysteresis to soil temperature measured at the shallowest soil layer among the FLUXNET- $\text{CH}_4$  site-years.** The distribution of mean seasonal  $\text{CH}_4$  emission hysteresis (a) and normalized area of seasonal  $\text{CH}_4$  emission hysteresis (c) to soil temperature measured at the shallowest soil layer among site-years derived from the FLUXNET- $\text{CH}_4$  database. Positive seasonal  $\text{CH}_4$  emission hysteresis indicates higher  $\text{CH}_4$  emission later in the frost-free season at the same soil temperature (e.g., Supplemental Figure 3). Red dashed lines represent the y-axis in each data group (i.e., no hysteresis). The corresponding boxplot of site-year specific mean seasonal  $\text{CH}_4$  emission hysteresis (b) and normalized area of seasonal  $\text{CH}_4$  emission hysteresis (d) derived from the FLUXNET- $\text{CH}_4$  database. The red central mark, and the bottom and top edges of the blue box indicate the median, and the 25<sup>th</sup> and 75<sup>th</sup> percentiles, respectively. The black whiskers extend to the most extreme data points not considered outliers denoted in red plus symbol(s).

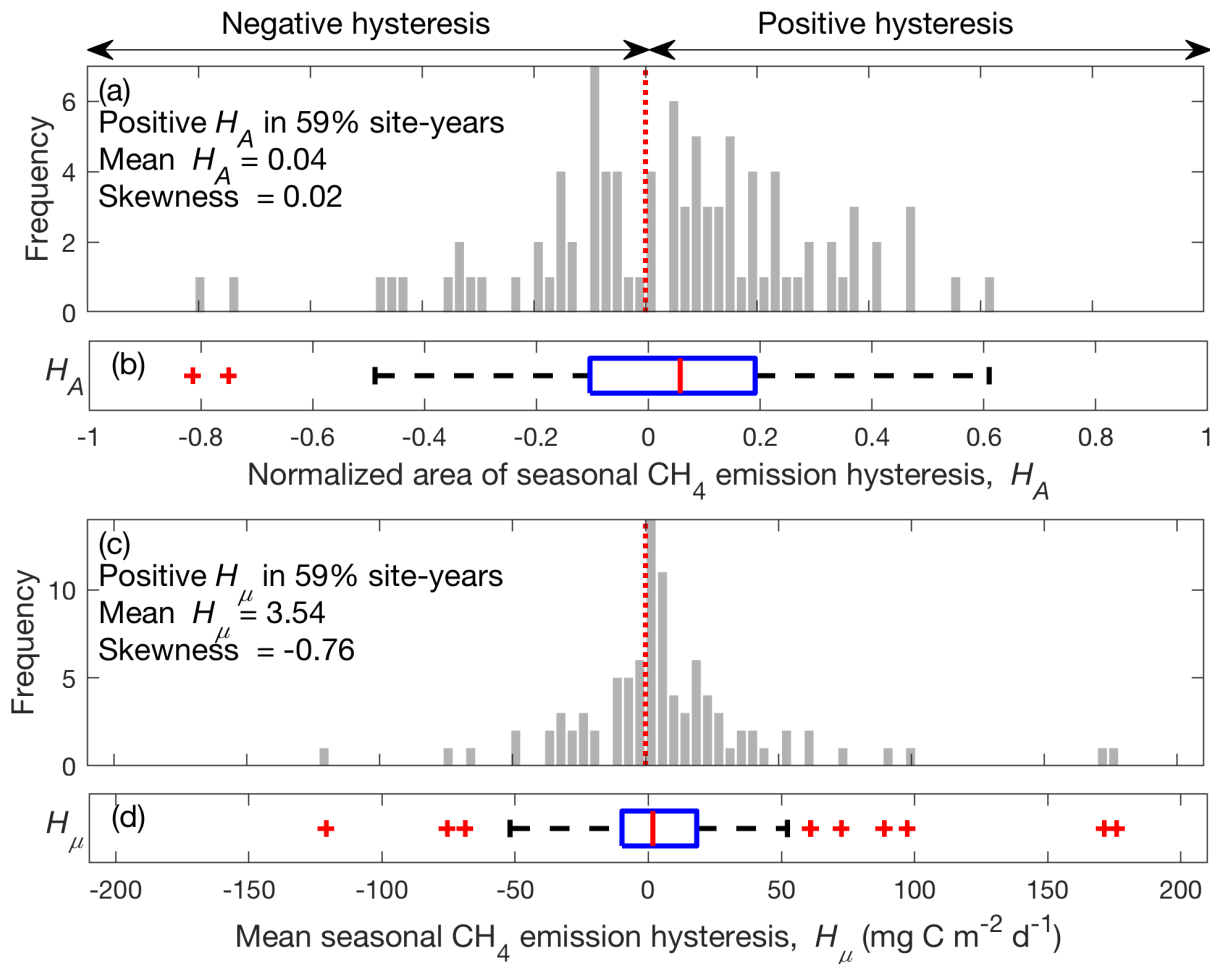

Supplemental Figure 13. **Predominantly positive seasonal CH<sub>4</sub> emission hysteresis to soil temperature measured at the deepest soil layer among the FLUXNET-CH<sub>4</sub> site-years.** The distribution of mean seasonal CH<sub>4</sub> emission hysteresis (a) and normalized area of seasonal CH<sub>4</sub> emission hysteresis (c) to soil temperature measured at the deepest soil layer among site-years derived from the FLUXNET-CH<sub>4</sub> database. Positive seasonal CH<sub>4</sub> emission hysteresis indicates higher CH<sub>4</sub> emission later in the frost-free season at the same soil temperature (e.g., Supplemental Figure 3). Red dashed lines represent the y-axis in each data group (i.e., no hysteresis). The corresponding boxplot of site-year specific mean seasonal CH<sub>4</sub> emission hysteresis (b) and normalized area of seasonal CH<sub>4</sub> emission hysteresis (d) derived from the FLUXNET-CH<sub>4</sub> database. The red central mark, and the bottom and top edges of the blue box indicate the median, and the 25<sup>th</sup> and 75<sup>th</sup> percentiles, respectively. The black whiskers extend to the most extreme data points not considered outliers denoted in red plus symbol(s).

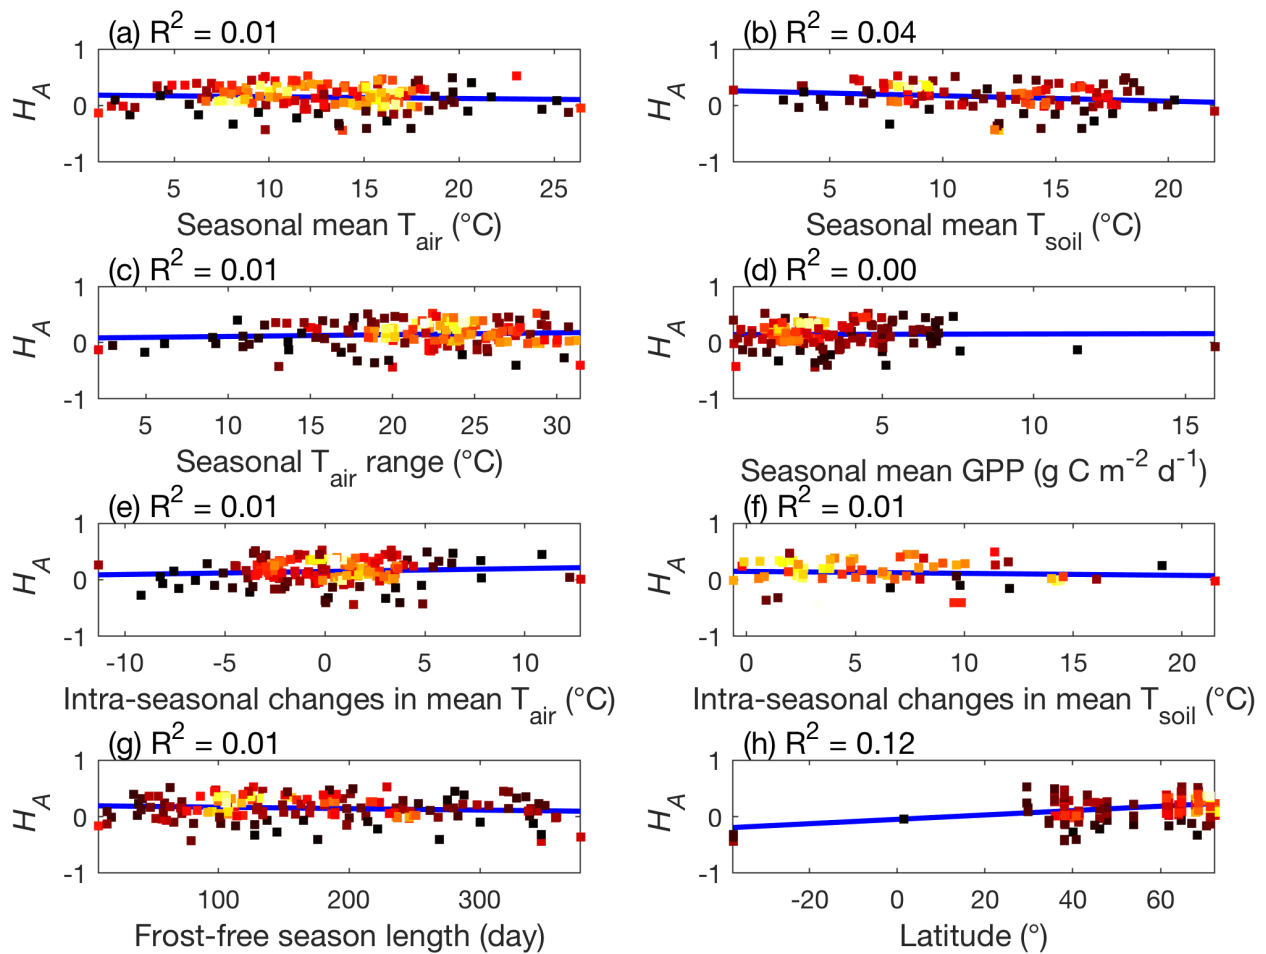

Supplemental Figure 14. **The observed seasonal CH<sub>4</sub> emission hysteresis is not sensitive to changes in temperature, gross primary productivity, frost-free season length and latitude.** The correlation between seasonal CH<sub>4</sub> emission hysteresis and seasonal mean air temperature (a), seasonal mean soil temperature (b), air temperature range measured in individual season (c), seasonal mean gross primary productivity (d), difference between mean air temperature measured in later and earlier parts of a frost-free season (e), difference between mean soil temperature measured in later and earlier parts of a frost-free season (f), frost-free season length (g), and latitude (h). Lighter colors in the density scatter plot represent denser data points. Solid blue lines represent the linear best fit.

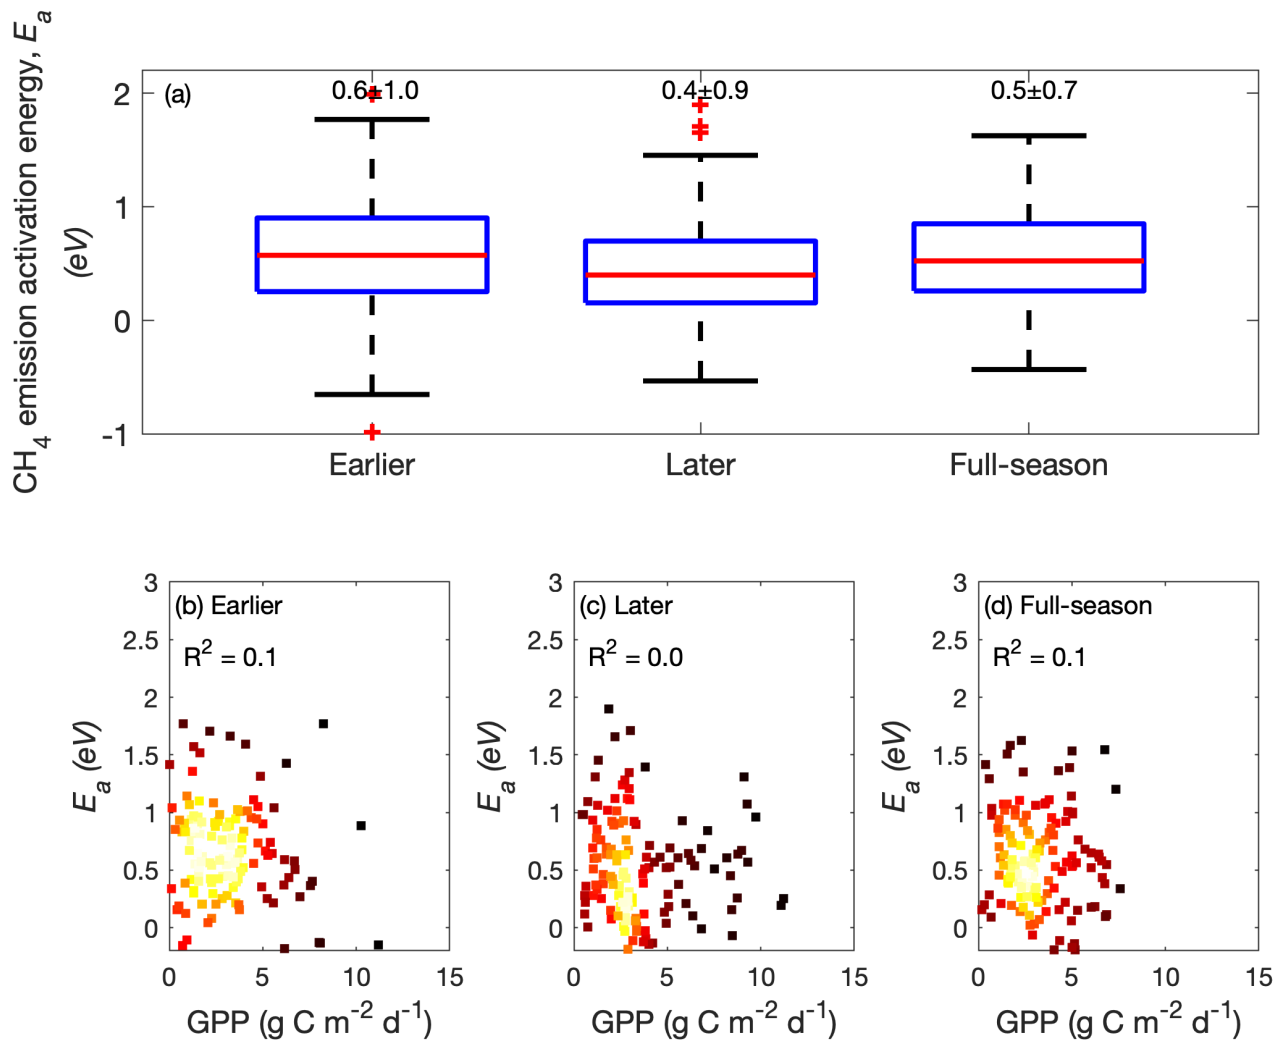

Supplemental Figure 15. **The apparent activation energy for CH<sub>4</sub> emission varies with the sampling period of the frost-free season.** The apparent activation energy for CH<sub>4</sub> emission inferred from the Boltzmann-Arrhenius equation (a), using measurements taken from the earlier, later, and full-season periods of a frost-free season across global wetland and rice paddy sites. The red central mark and open circle, and the bottom and top edges of the blue box indicate the median and mean, and the 25<sup>th</sup> and 75<sup>th</sup> percentiles, respectively. The black whiskers extend to the most extreme data points not considered outliers denoted in red plus symbol(s). Numbers above each boxplot indicate the mean  $\pm$  standard deviation. Density scatter plots between gross primary productivity (GPP) and apparent activation energy for CH<sub>4</sub> emission ( $E_a$ ) during the earlier (b), later (c), and full-season (d) periods of a frost-free season. Lighter colors in the density scatter plot represent denser data points.

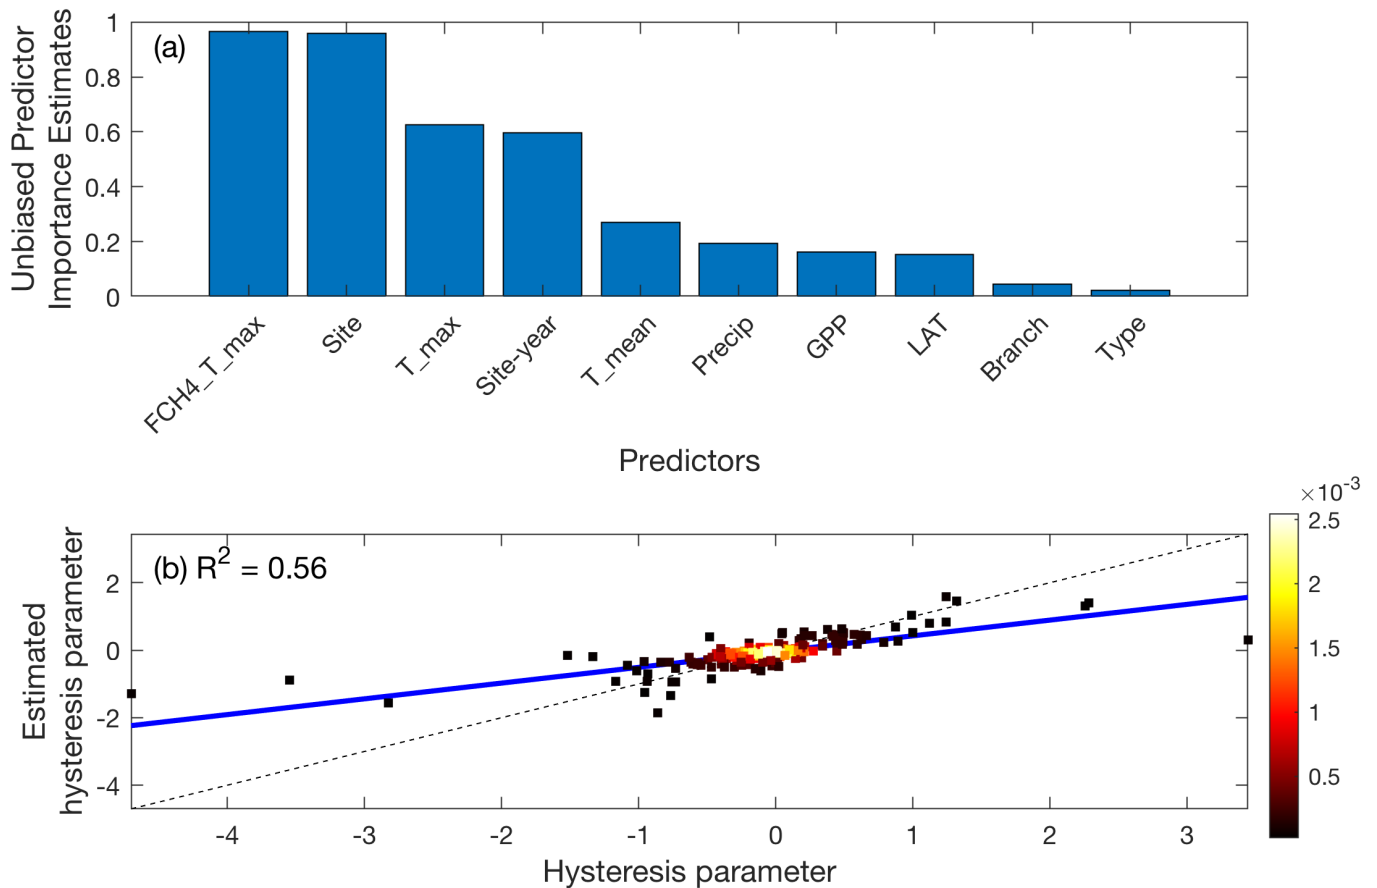

Supplemental Figure 16. **The accuracy of CH<sub>4</sub> emission predictions is strongly controlled by ecosystem-site variability.** The variable importance estimated by the random-forest model (a) and the performance of the estimated hysteresis parameter that quantifies the functional relationship between CH<sub>4</sub> emission and air temperature (b). Ten predictors were compared for their variable importance: earlier or later part in the frost-free season (Branch), gross primary productivity cumulated in each seasonal branch (GPP), precipitation cumulated in each seasonal branch (Precip), maximum seasonal temperature (T\_max), mean temperature in each seasonal branch (T\_mean), ecosystem type (Type), latitude (LAT), site (Site), site-year (Site-year) and CH<sub>4</sub> emission measured at maximum seasonal temperature (FCH4\_T\_max). Lighter colors in the density scatter plot (b) represent denser data points. Solid blue and dashed black lines represent the linear best fit and one to one lines, respectively.

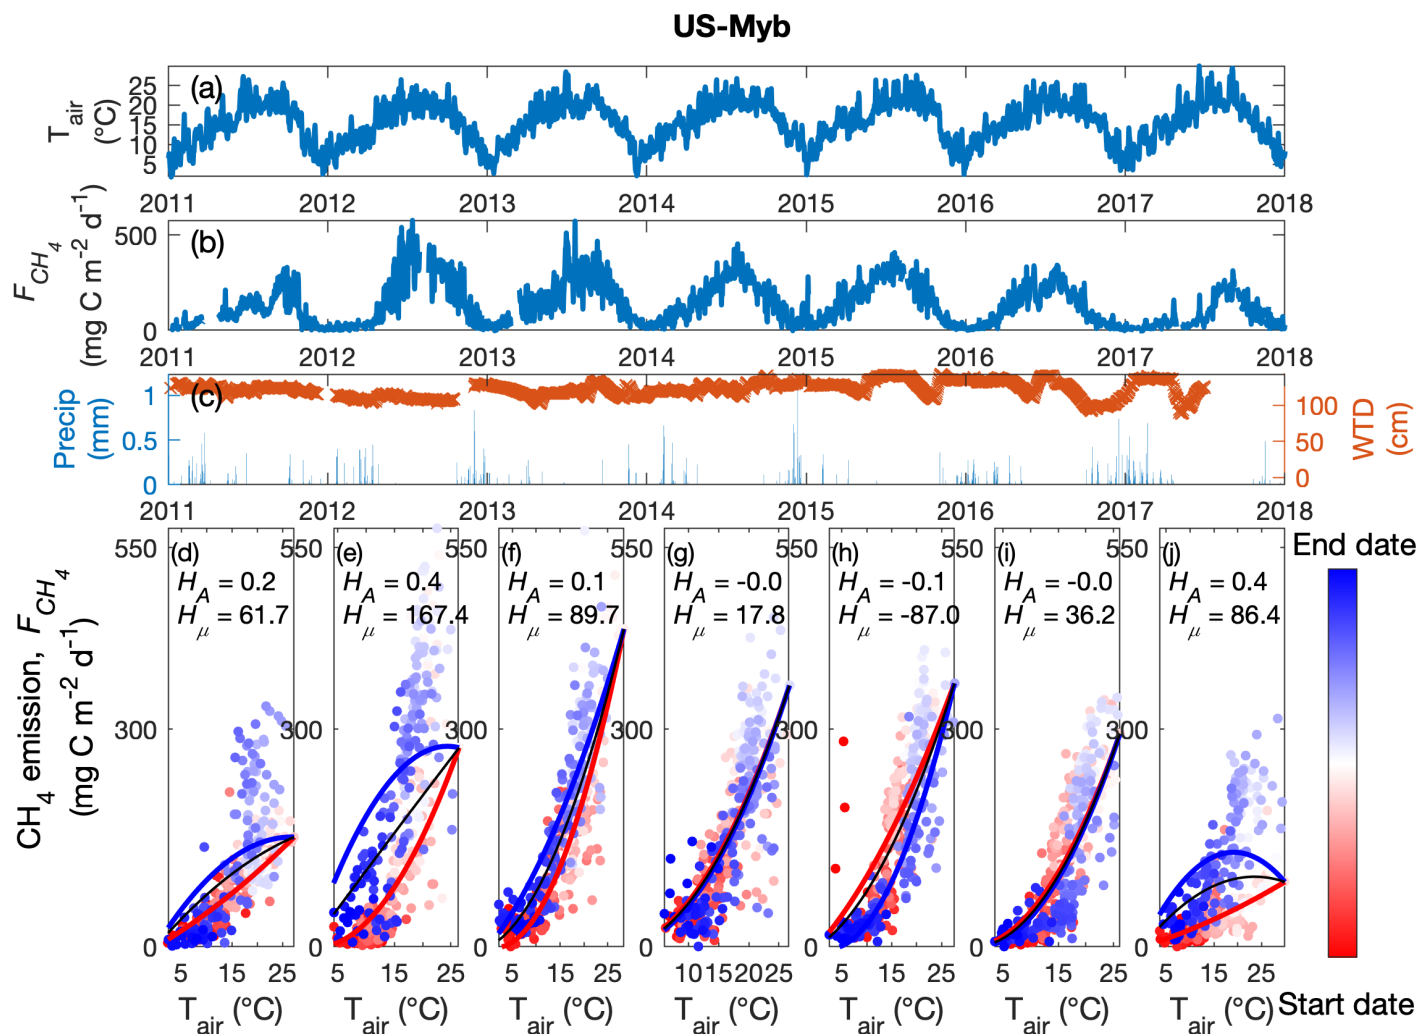

Supplemental Figure 17. **Seasonal CH<sub>4</sub> emission hysteresis shifts from positive to negative with increased salinity during 2014-2016.** The quality-controlled daily air temperature (a), CH<sub>4</sub> emissions (b), precipitation (c, left axis), and water table depth (c, right axis) measured at the Sacramento-San Joaquin Delta of California in USA (US-Myb) from 2011 to 2017. CH<sub>4</sub> emission air temperature dependencies (lines) derived from daily measurements (dots) recorded at US-Myb from 2011 (d) to 2017 (j). The results inferred from earlier and later parts of the frost-free season, and full frost-free season are colored in red, blue, and black, respectively. Start and end dates represent the beginning and ending of the frost-free season, respectively. The seasonal CH<sub>4</sub> emission hysteresis rotates from positive (2011-2013), neutral (2014 and 2016), to negative (2015), which may be related to the increased salinity during 2014-2016.

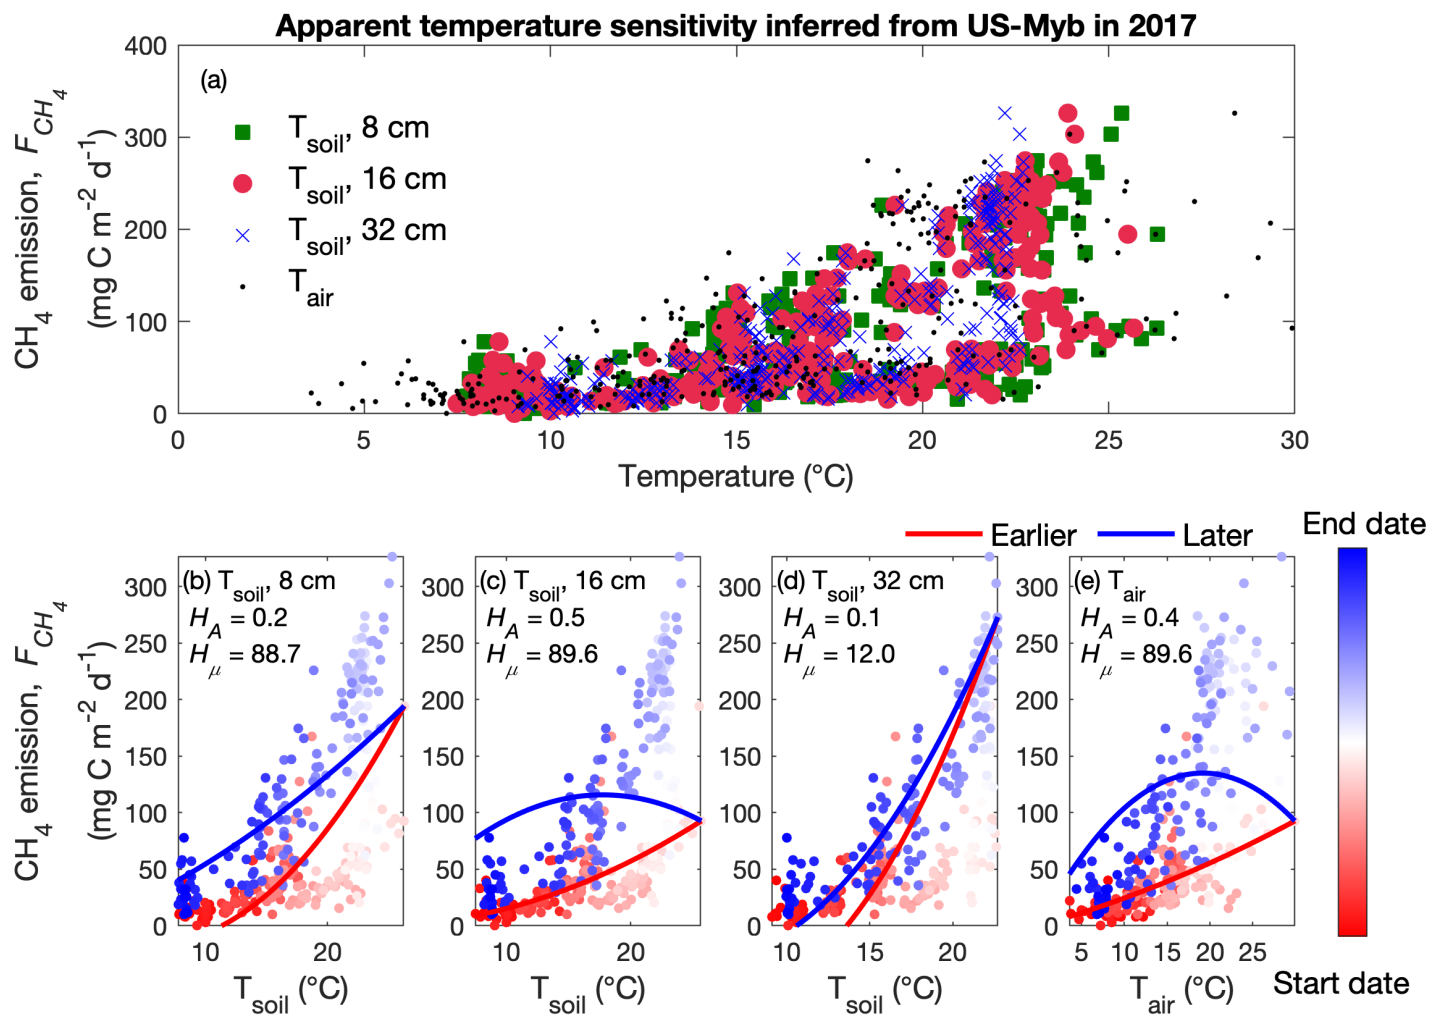

Supplemental Figure 18. **The magnitude of seasonal  $\text{CH}_4$  emission hysteresis varies non-monotonically along the soil profile.** The emergent dependence of  $\text{CH}_4$  emission on air and soil temperatures inferred from measurements taken at the Sacramento-San Joaquin Delta of California in USA (US-Myb) in 2017 (a). Daily measurements of  $\text{CH}_4$  emission and temperature for soil temperature measured at 8 cm (b), for soil temperature measured at 16 cm (c), for soil temperature  $T_{\text{soil}}$  measured at 32 cm (d), and for air temperature (e). The results inferred from earlier and later parts of the frost-free season are colored in red and blue, respectively. Start and end dates represent the beginning and ending of the frost-free season, respectively.



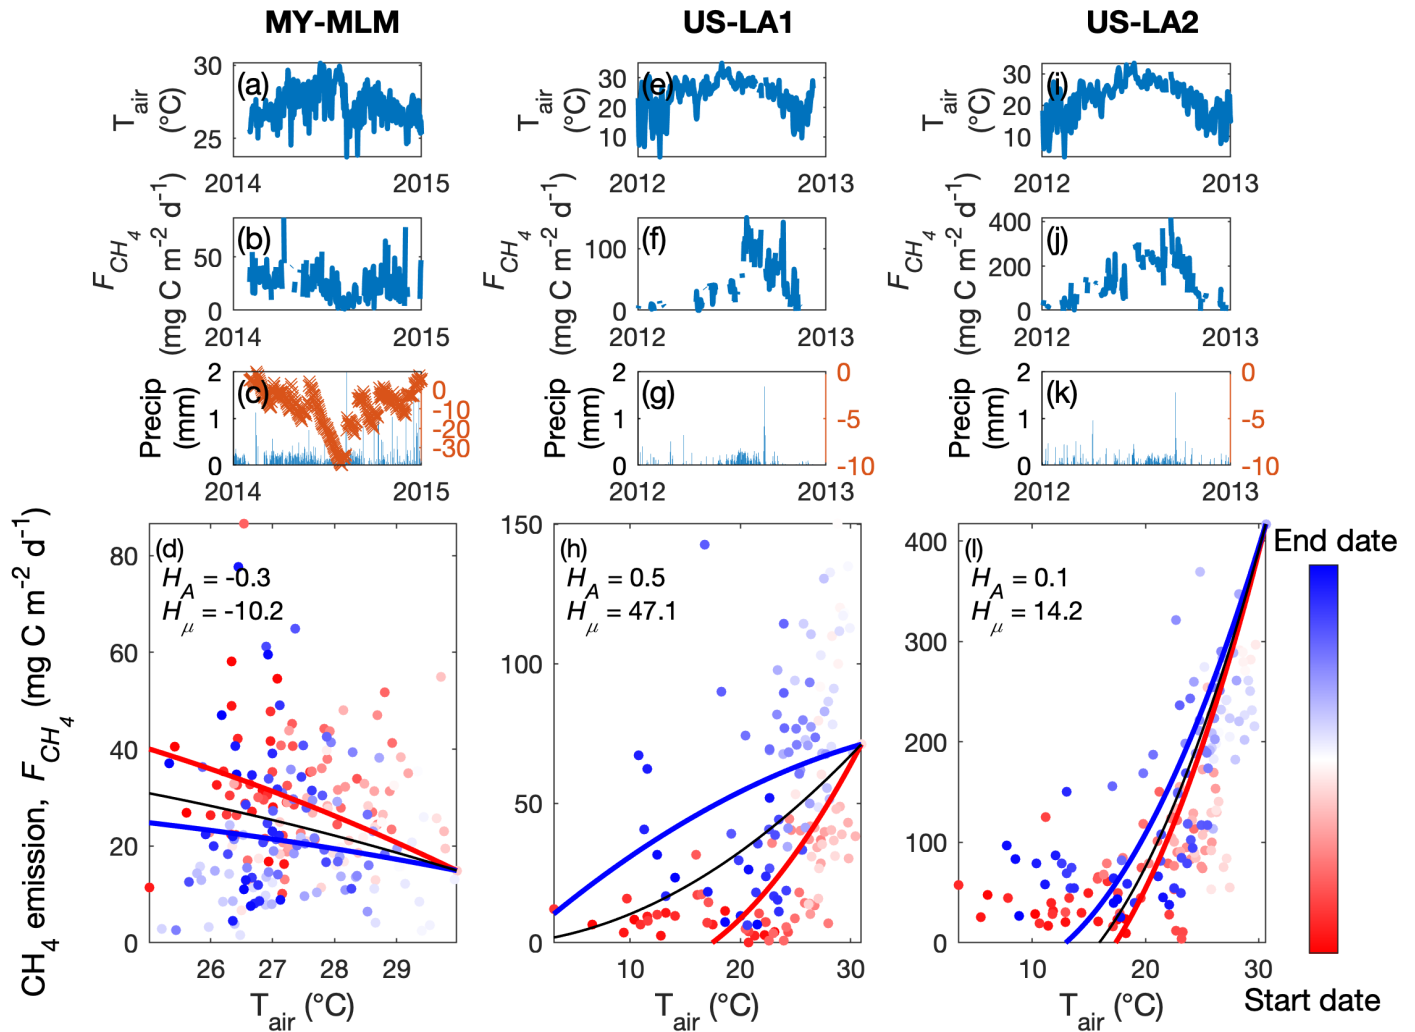

Supplemental Figure 19. **Intra-seasonally varying emergent air temperature dependence on CH<sub>4</sub> emission is detected in tropical and subtropical sites.** The quality-controlled daily air temperature (a, e, i) and CH<sub>4</sub> emissions (b, f, j), precipitation (c, g, k, left axis), and water table depth (c, g, k, right axis) measured at Maludam swamp in Malaysia (MY-MLM), Brackish marsh in the US (US-LA1), and Freshwater marsh in the US (US-LA2), respectively. CH<sub>4</sub> emission air temperature dependencies (lines) derived from daily measurements (dots) recorded at MY-MLM for 2014 (d), at US-LA1 for 2012 (h), and at US-LA2 for 2012 (l). The results inferred from earlier and later parts of the frost-free season, and full frost-free season are colored in red, blue, and black, respectively. Start and end dates represent the beginning and ending of the frost-free season, respectively.  $H_{\mu}$  and  $H_A$  denote the mean seasonal CH<sub>4</sub> emission hysteresis and normalized area of seasonal CH<sub>4</sub> emission hysteresis calculated in each site-year, respectively.

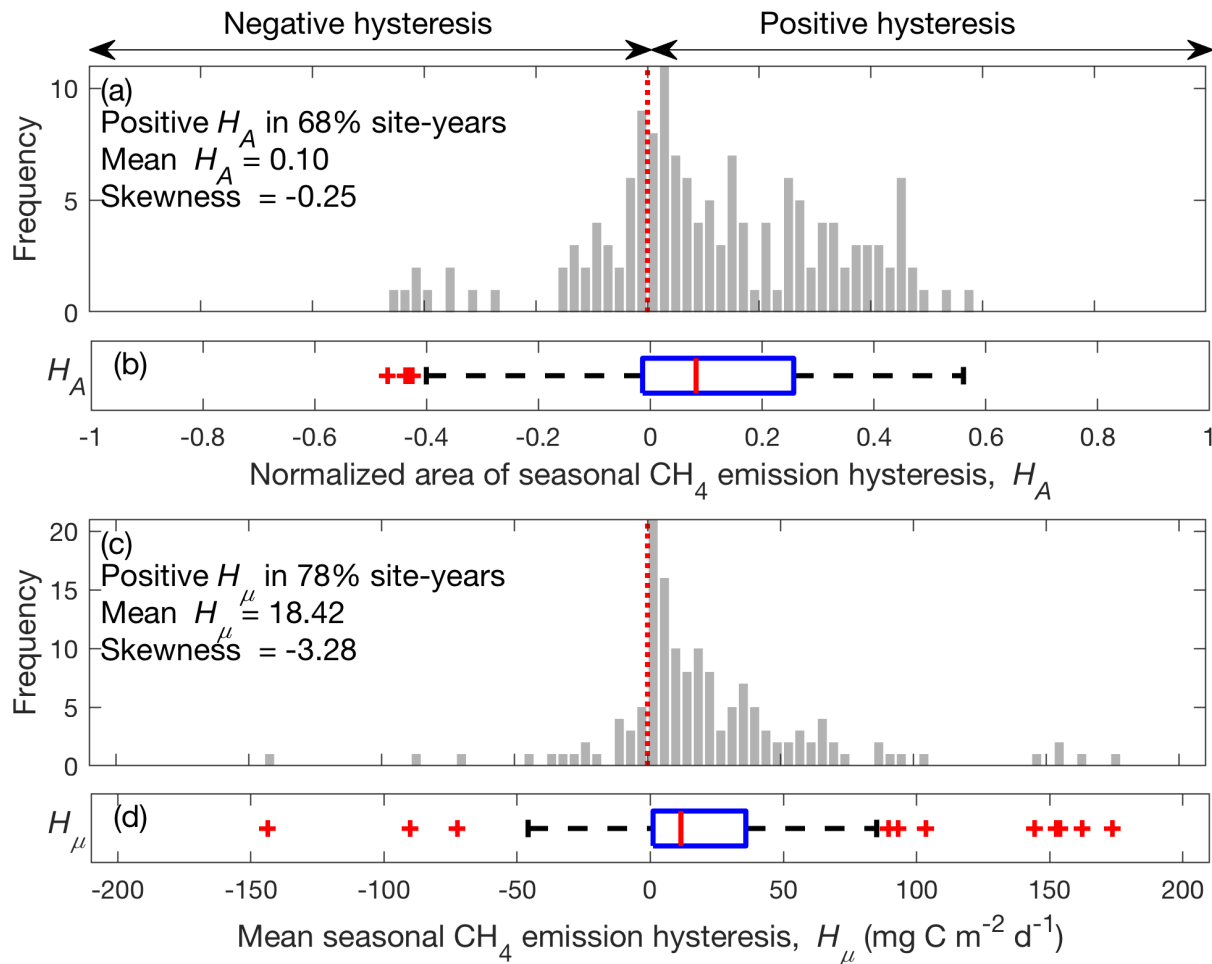

Supplemental Figure 20. **The distribution of seasonal CH<sub>4</sub> emission hysteresis inferred from the period when gross primary productivity (GPP) is above zero is consistent with the patterns found using data collected during the frost-free season.** The distribution of mean seasonal CH<sub>4</sub> emission hysteresis (a) and normalized area of seasonal CH<sub>4</sub> emission hysteresis (c) to air temperature among site-years derived from the FLUXNET-CH<sub>4</sub> database, when GPP > 0. Positive seasonal CH<sub>4</sub> emission hysteresis indicates higher CH<sub>4</sub> emission later in the frost-free season at the same air temperature (e.g., Figure 1). Red dashed lines represent the y-axis in each data group (i.e., no hysteresis). The corresponding boxplot of site-year specific mean seasonal CH<sub>4</sub> emission hysteresis (b) and normalized area of seasonal CH<sub>4</sub> emission hysteresis (d) derived from the FLUXNET-CH<sub>4</sub> database. The red central mark, and the bottom and top edges of the blue box indicate the median, and the 25<sup>th</sup> and 75<sup>th</sup> percentiles, respectively. The black whiskers extend to the most extreme data points not considered outliers denoted in red plus symbol(s).

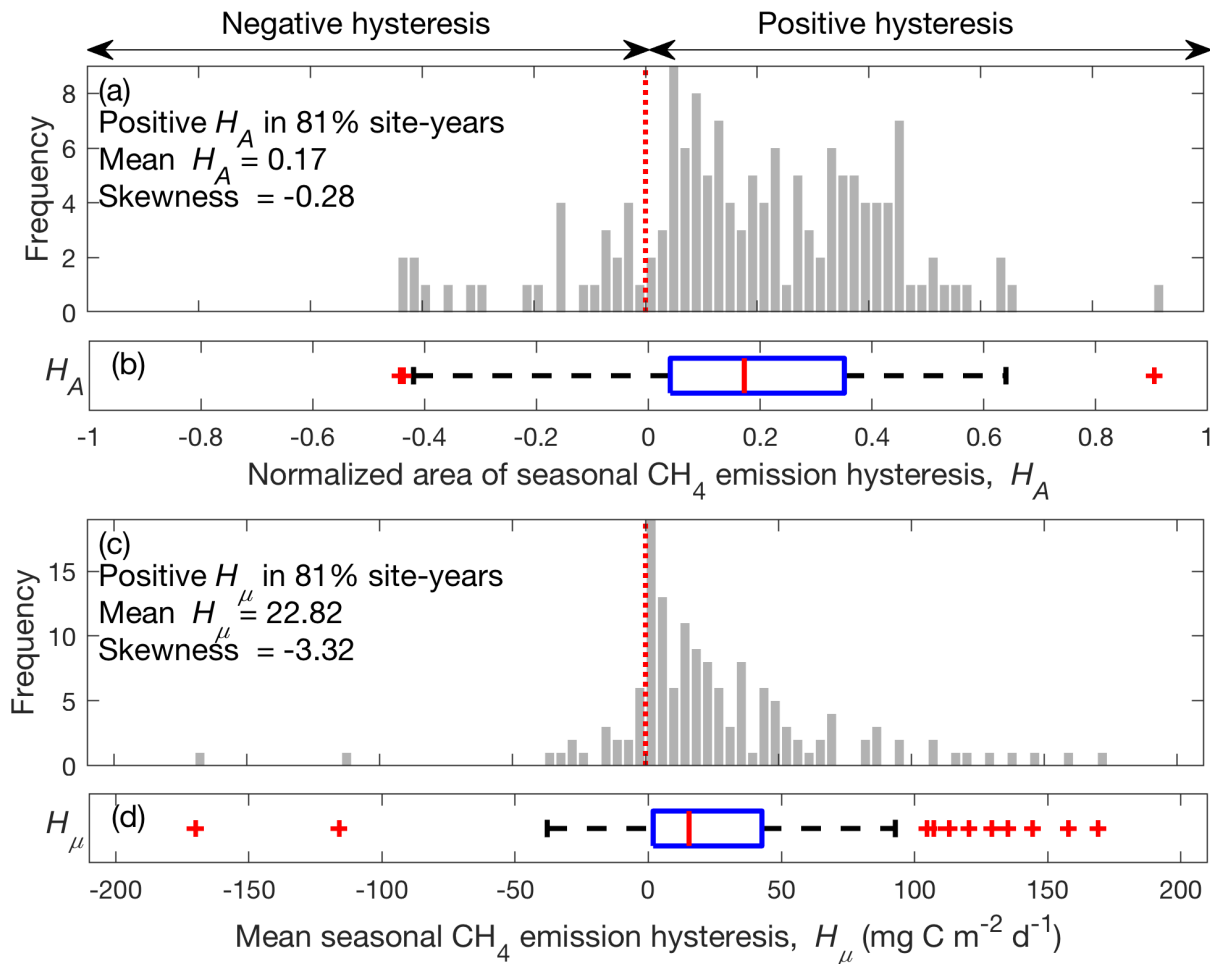

Supplemental Figure 21. **The distribution of seasonal CH<sub>4</sub> emission hysteresis inferred from the period when gross primary productivity (GPP) is above 5% of annual GPP maximum is consistent with the patterns found using data collected during the frost-free season.** The distribution of mean seasonal CH<sub>4</sub> emission hysteresis (a) and normalized area of seasonal CH<sub>4</sub> emission hysteresis (c) to air temperature among site-years derived from the FLUXNET-CH<sub>4</sub> database, when GPP > 5% of annual GPP maximum. Positive seasonal CH<sub>4</sub> emission hysteresis indicates higher CH<sub>4</sub> emission later in the frost-free season at the same air temperature (e.g., Figure 1). Red dashed lines represent the y-axis in each data group (i.e., no hysteresis). The corresponding boxplot of site-year specific mean seasonal CH<sub>4</sub> emission hysteresis (b) and normalized area of seasonal CH<sub>4</sub> emission hysteresis (d) derived from the FLUXNET-CH<sub>4</sub> database. The red central mark, and the bottom and top edges of the blue box indicate the median, and the 25<sup>th</sup> and 75<sup>th</sup> percentiles, respectively. The black whiskers extend to the most extreme data points not considered outliers denoted in red plus symbol(s).

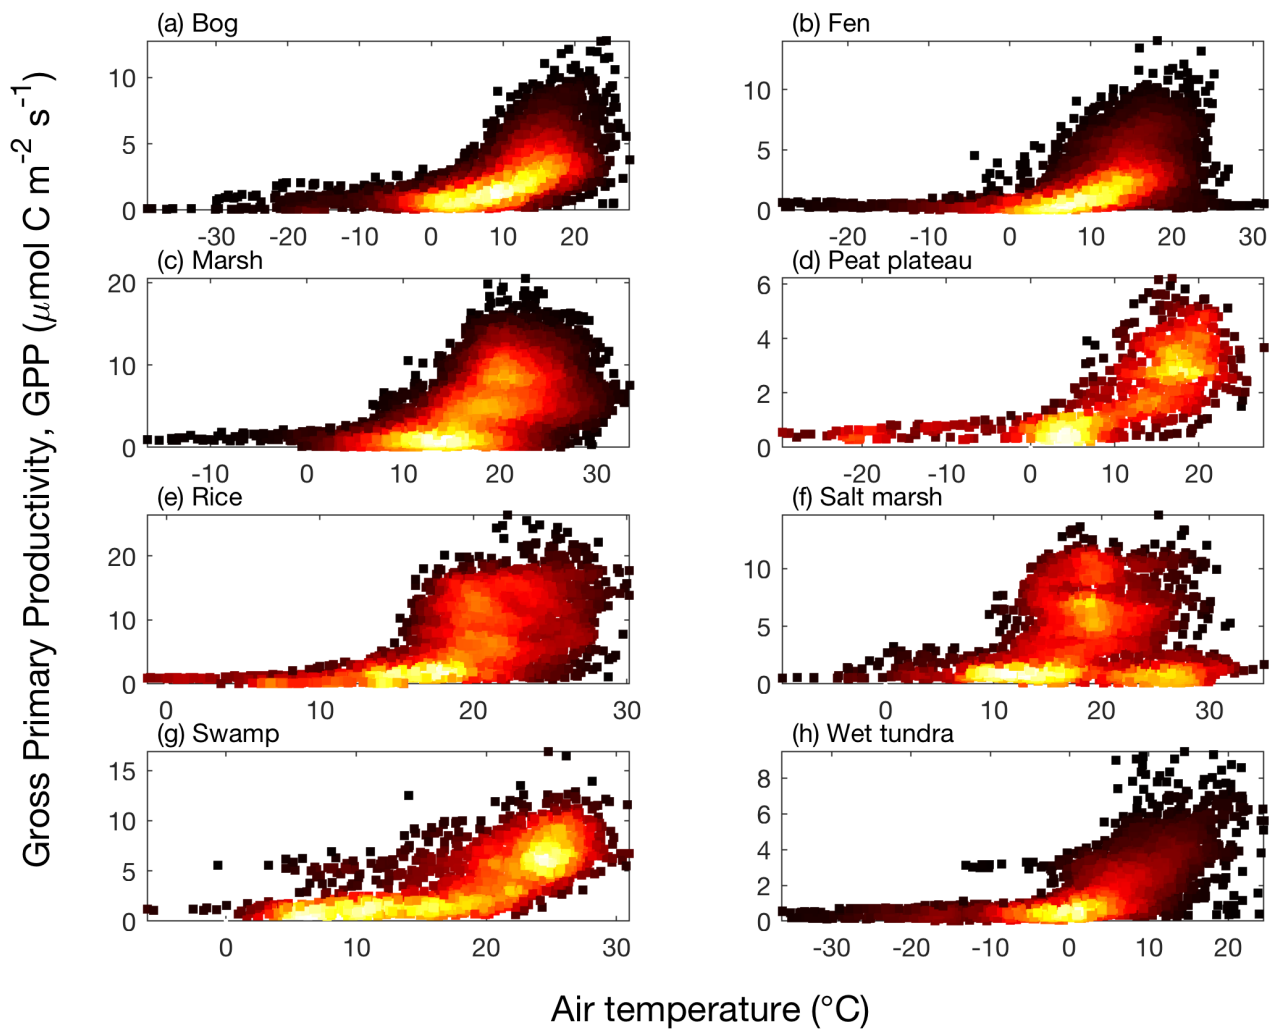

Supplemental Figure 22. **Substantial GPP values are detected when air temperatures are well below 0 °C.** Density scatter plots between gross primary productivity (GPP) and air temperature measured at the bog (a), fen (b), marsh (c), peat plateau (d), rice paddy (e), salt marsh (f), swamp (g), and wet tundra (h) sites, when gross primary production (GPP) is greater than 5% of annual GPP maximum.

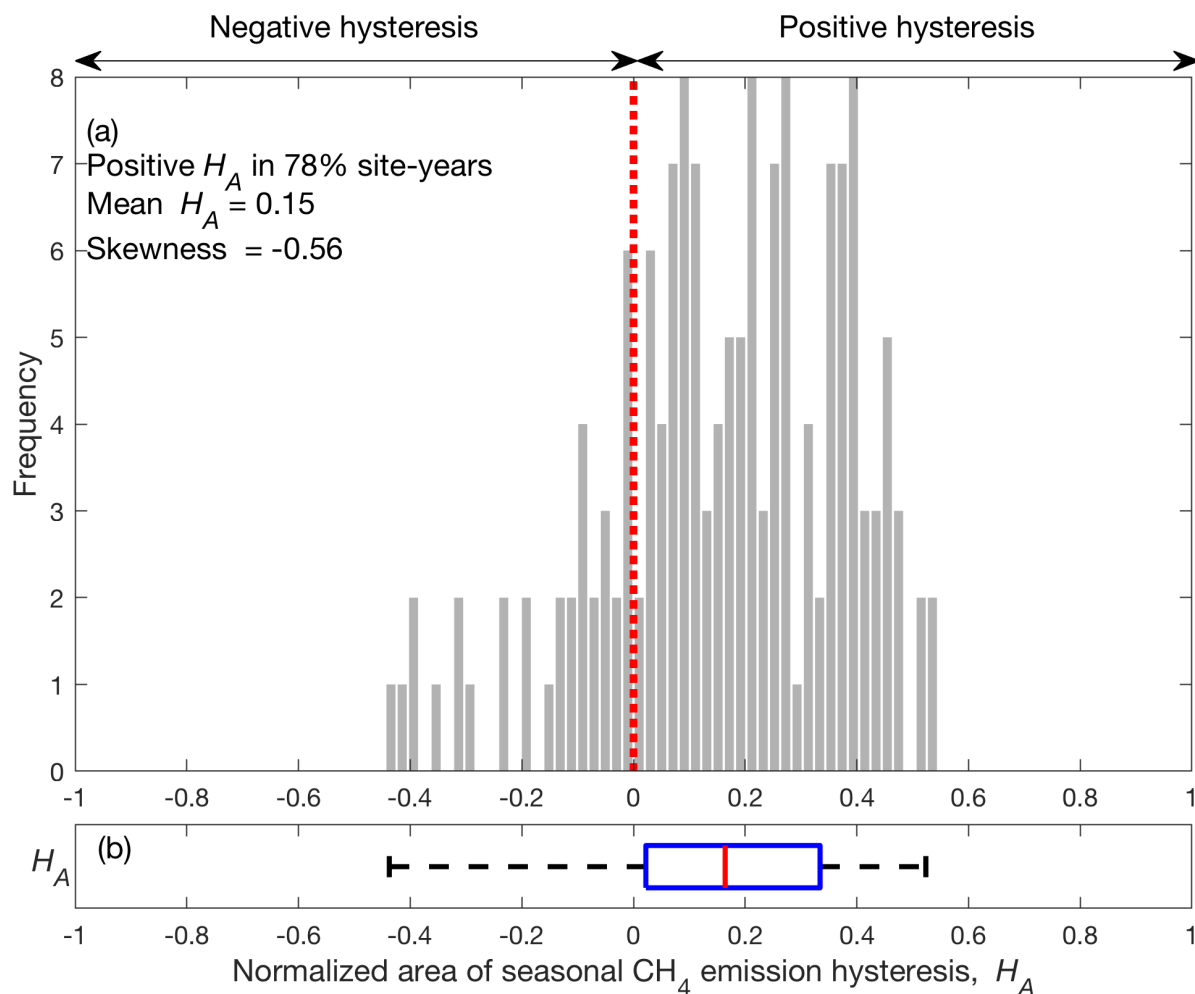

Supplemental Figure 23. **The distribution of seasonal  $\text{CH}_4$  emission hysteresis inferred from non-zero  $\text{CH}_4$  emissions at  $0^\circ\text{C}$  is consistent with the patterns found assuming no  $\text{CH}_4$  emissions at  $0^\circ\text{C}$ .** The distribution of normalized area of seasonal  $\text{CH}_4$  emission hysteresis ( $H_A$ ) to air temperature among site-years derived from the FLUXNET- $\text{CH}_4$  database, when mean  $\text{CH}_4$  emission between  $-0.5$  to  $0.5^\circ\text{C}$  is used to represent  $\text{CH}_4$  emissions at  $0^\circ\text{C}$  (a). Positive seasonal  $\text{CH}_4$  emission hysteresis indicates higher  $\text{CH}_4$  emissions later in the frost-free season at the same temperature (e.g., Fig. 1d to 1f). Red dashed lines represent the y-axis in each data group (i.e., no hysteresis). The corresponding boxplot of site-year specific  $H_A$  derived from the FLUXNET- $\text{CH}_4$  database (b). The red central mark, and the bottom and top edges of the blue box indicate the median, and the 25<sup>th</sup> and 75<sup>th</sup> percentiles, respectively. The black whiskers extend to the most extreme data points not considered outliers denoted in red plus symbol(s).
